# Supplementary material for: A relay ring-opening/double ring-closing metathesis strategy for the bicyclic macrolide-butenolide core structures
Source: Royal Society of Chemistry journal article supplement (doi:10.1039/c4ra10937f), 2014-11-12

## Supporting Information

### **A Relay Ring-Opening/Double Ring-Closing Metathesis Strategy for the Bicyclic Macrolide-Butenolide Core Structures**

Mahesh B. Halle and Rodney A. Fernandes\*

*Department of Chemistry, Indian Institute of Technology Bombay, Powai,  
Mumbai 400 076 Maharashtra, India. E-mail: rfernand@chem.iitb.ac.in*

Copies of  $^1\text{H}$  and  $^{13}\text{C}$  NMR spectra for all the compounds ..... S2–S20

<sup>1</sup>H NMR (400 MHz, CDCl<sub>3</sub>/TMS) and <sup>13</sup>C NMR (100 MHz, CDCl<sub>3</sub>) of Compound **9a**

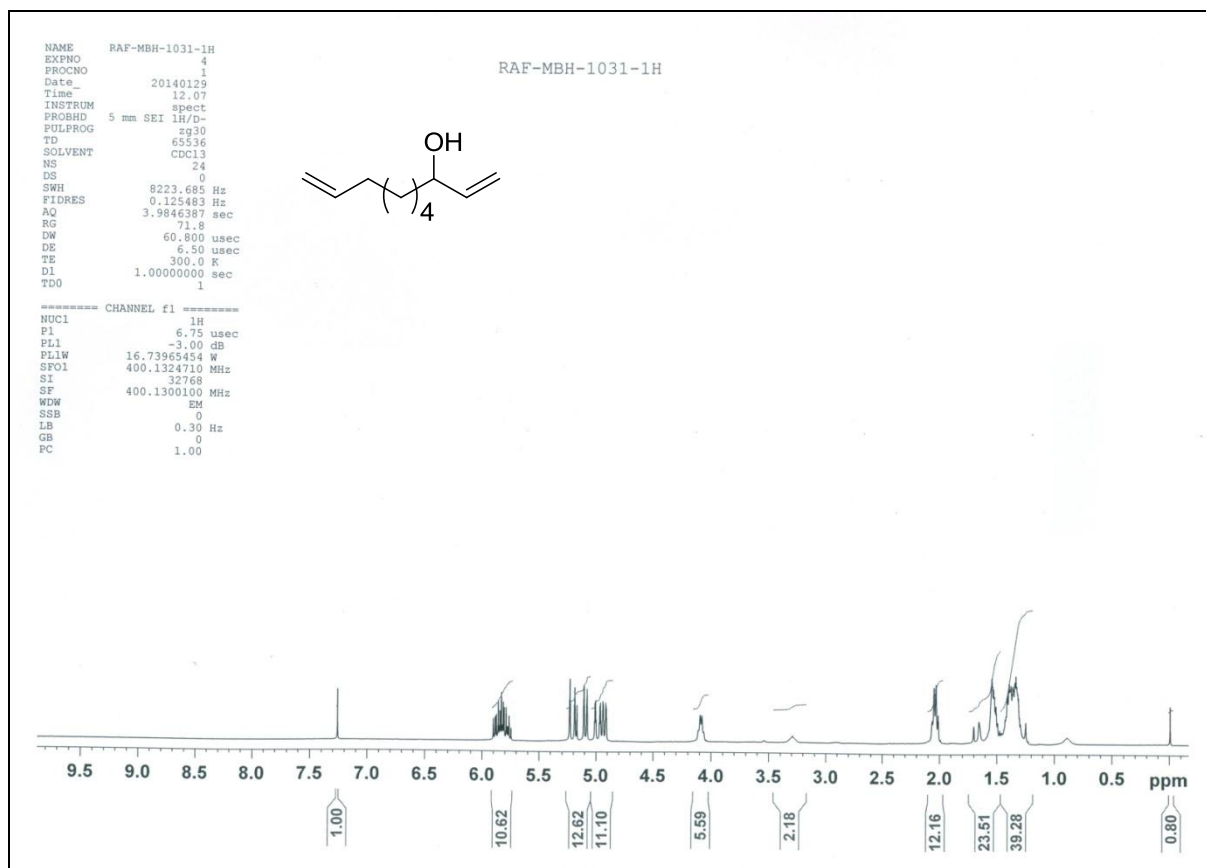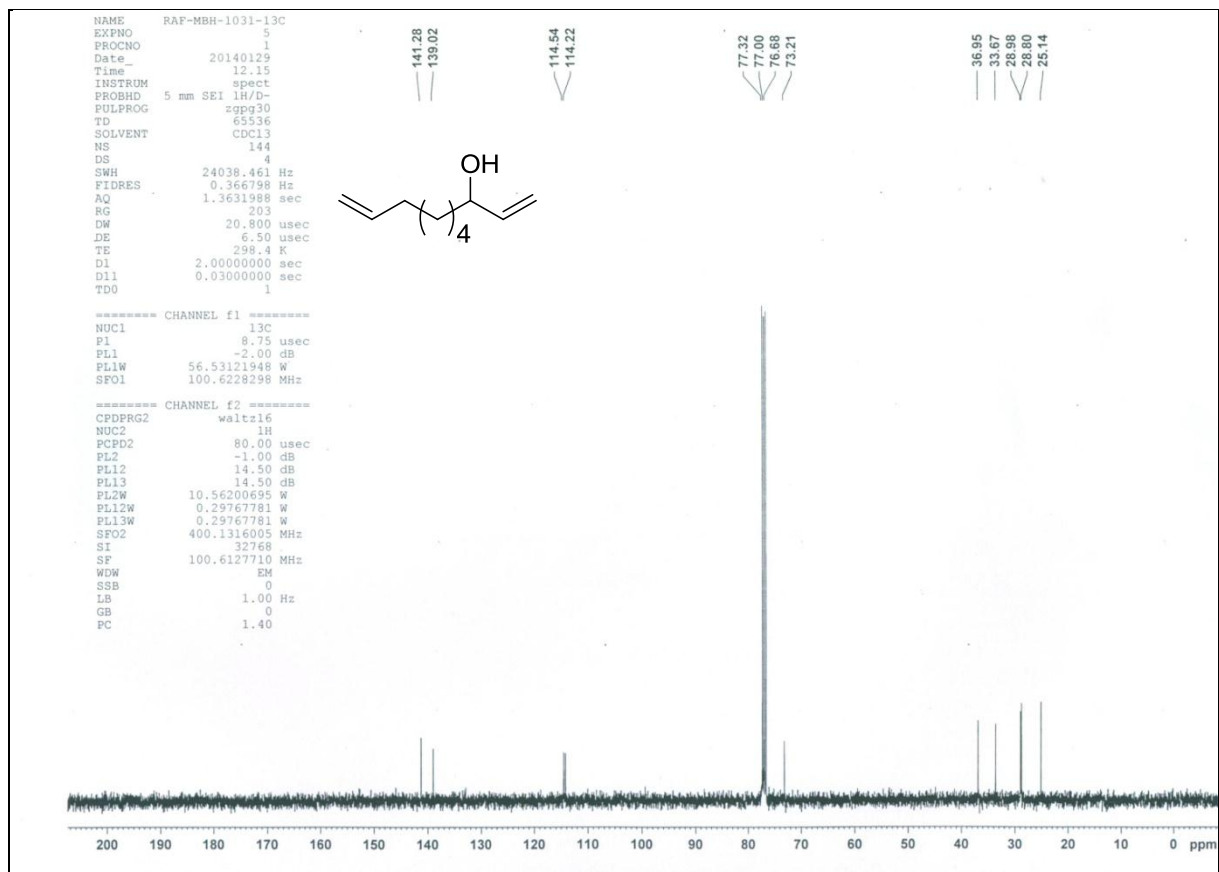

<sup>1</sup>H NMR (500 MHz, CDCl<sub>3</sub>/TMS) and <sup>13</sup>C NMR (125 MHz, CDCl<sub>3</sub>) of Compound **9b**

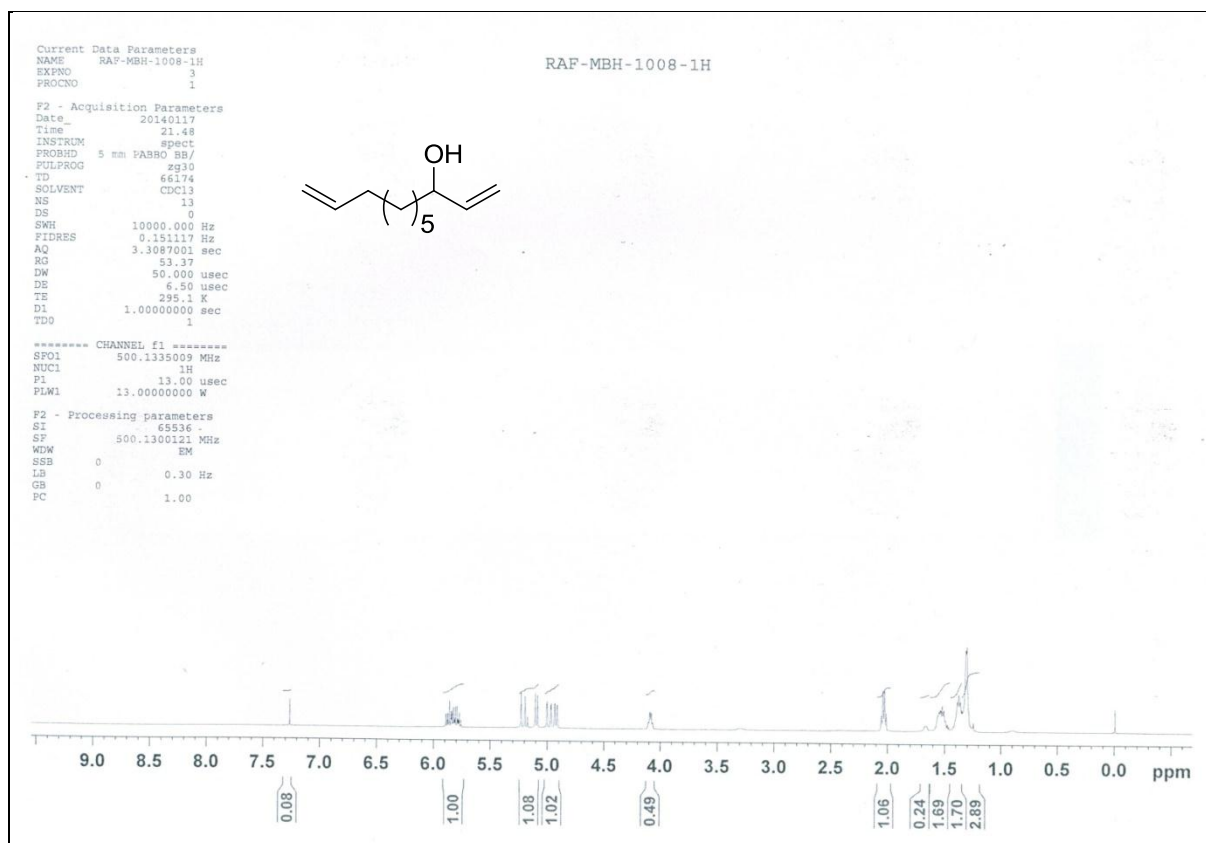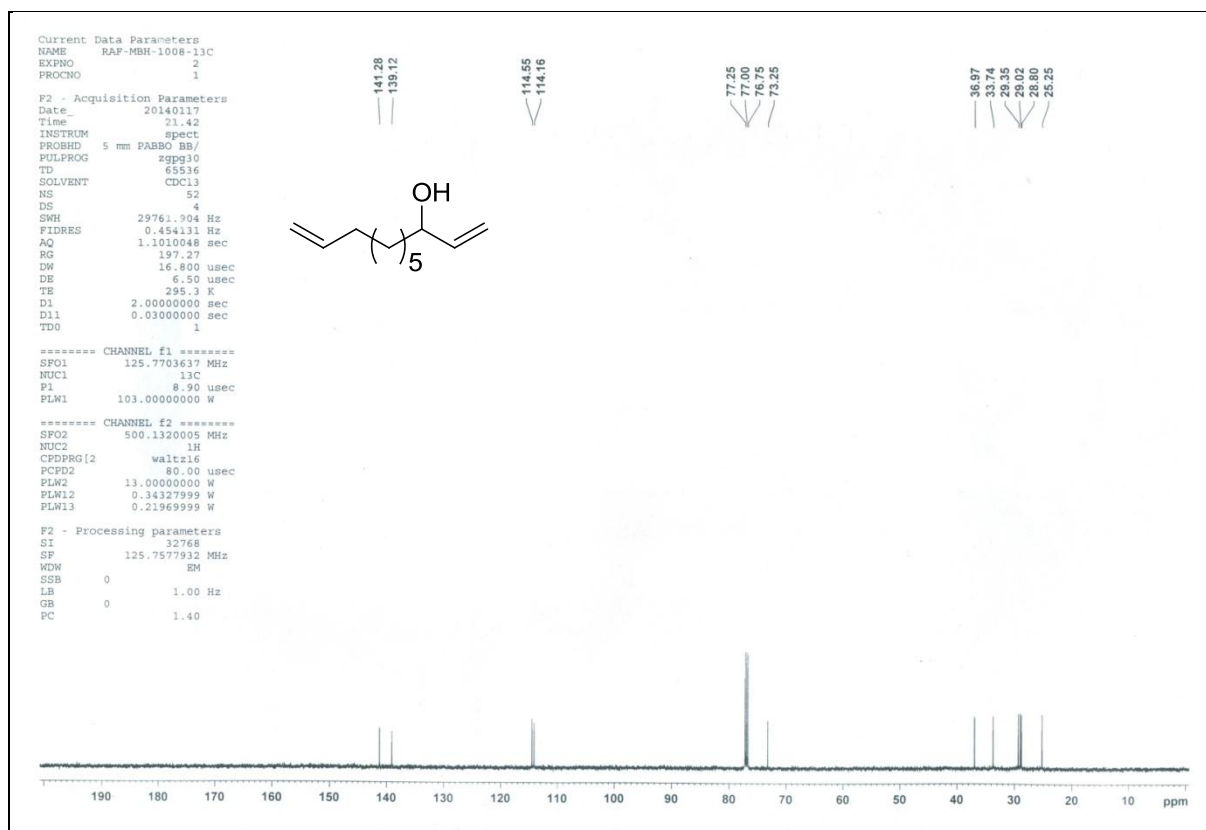

<sup>1</sup>H NMR (400 MHz, CDCl<sub>3</sub>/TMS) and <sup>13</sup>C NMR (100 MHz, CDCl<sub>3</sub>) of Compound **9c**

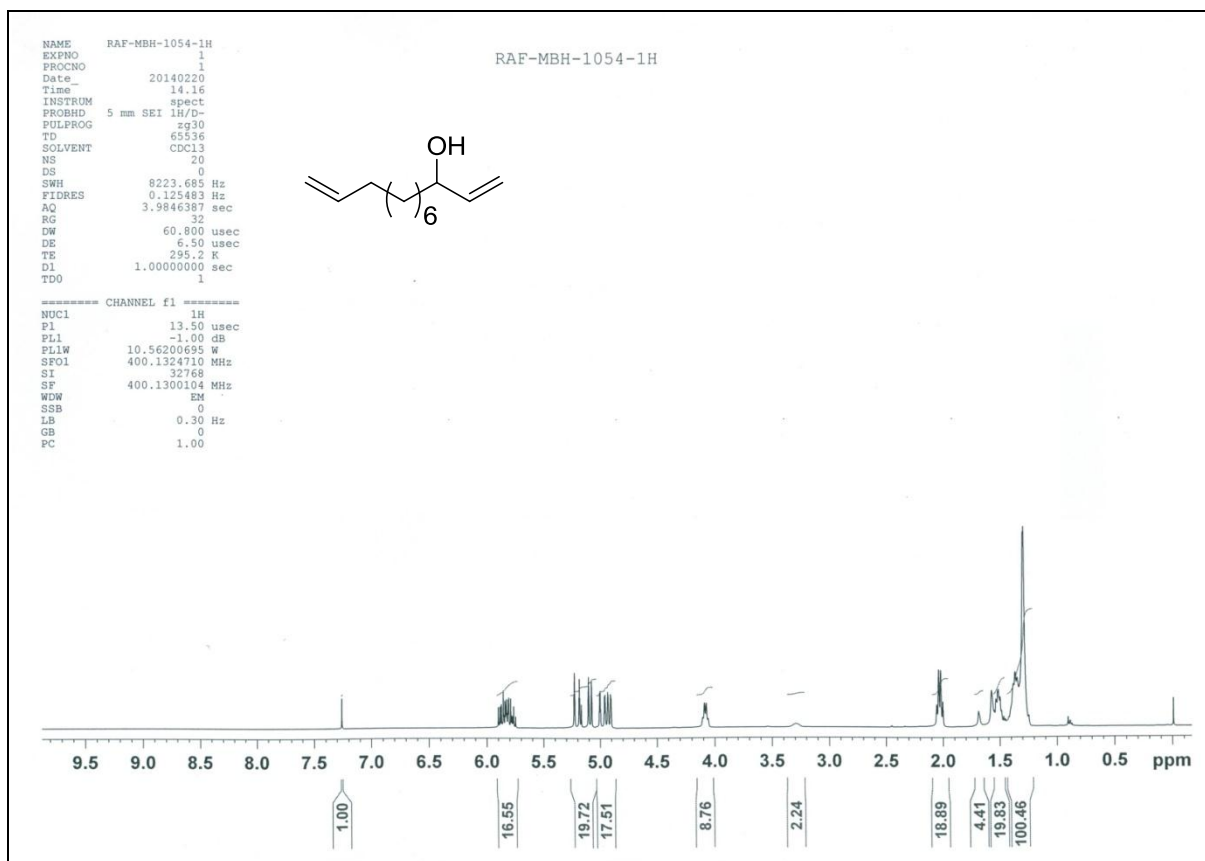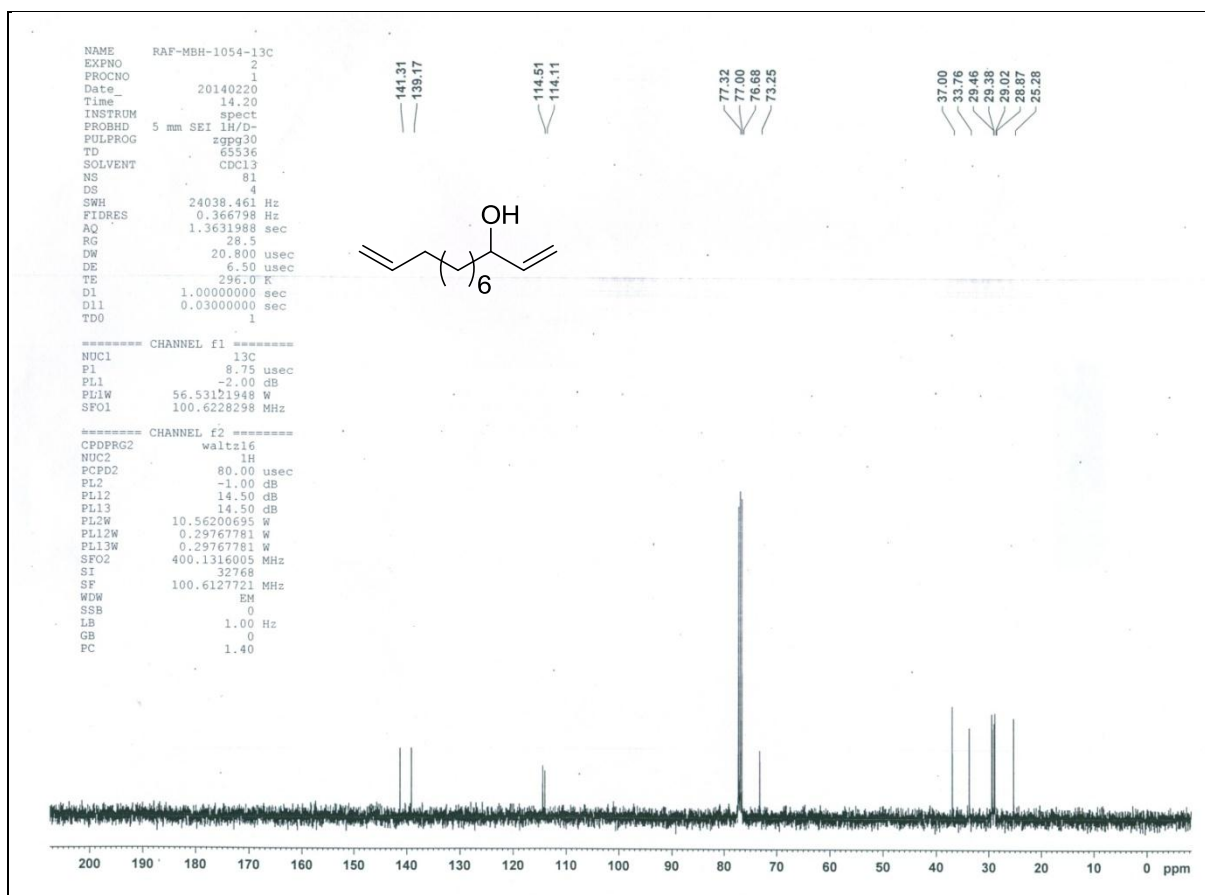

<sup>1</sup>H NMR (400 MHz, CDCl<sub>3</sub>/TMS) and <sup>13</sup>C NMR (100 MHz, CDCl<sub>3</sub>) of Compound **9d**

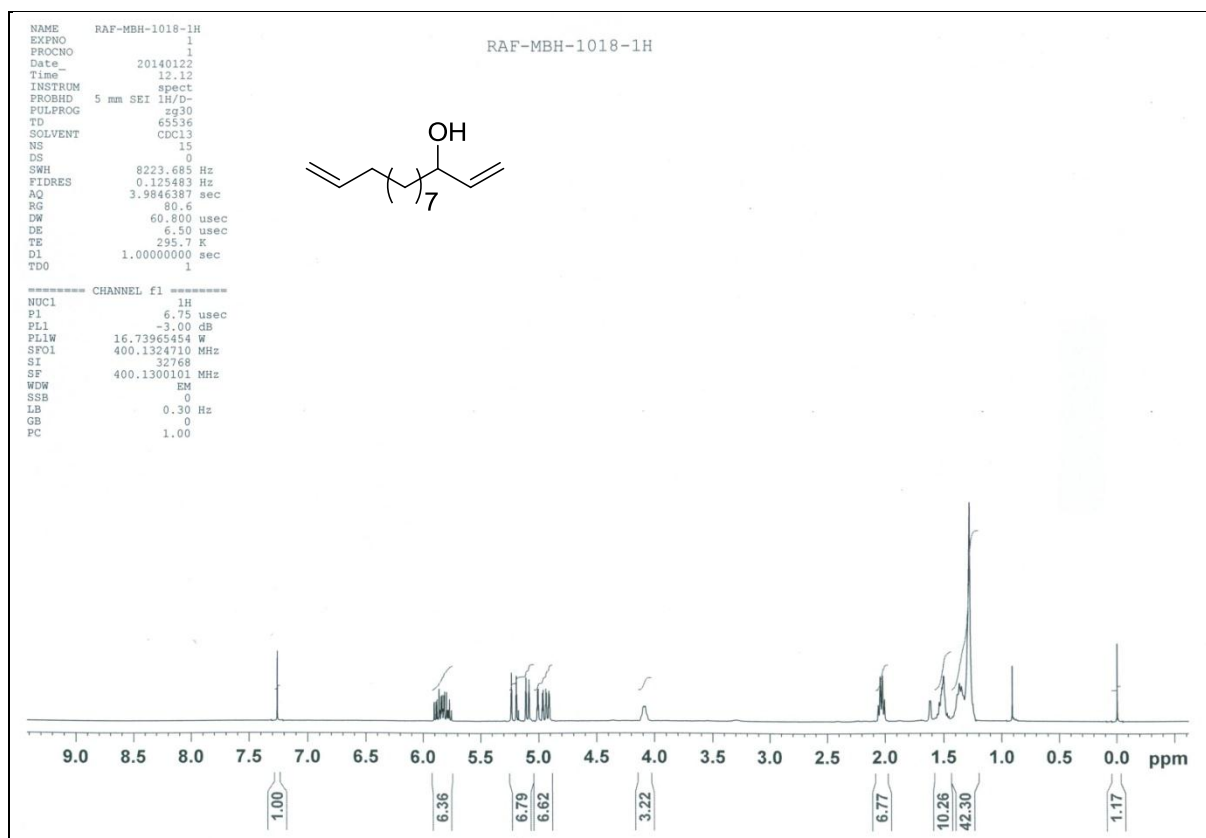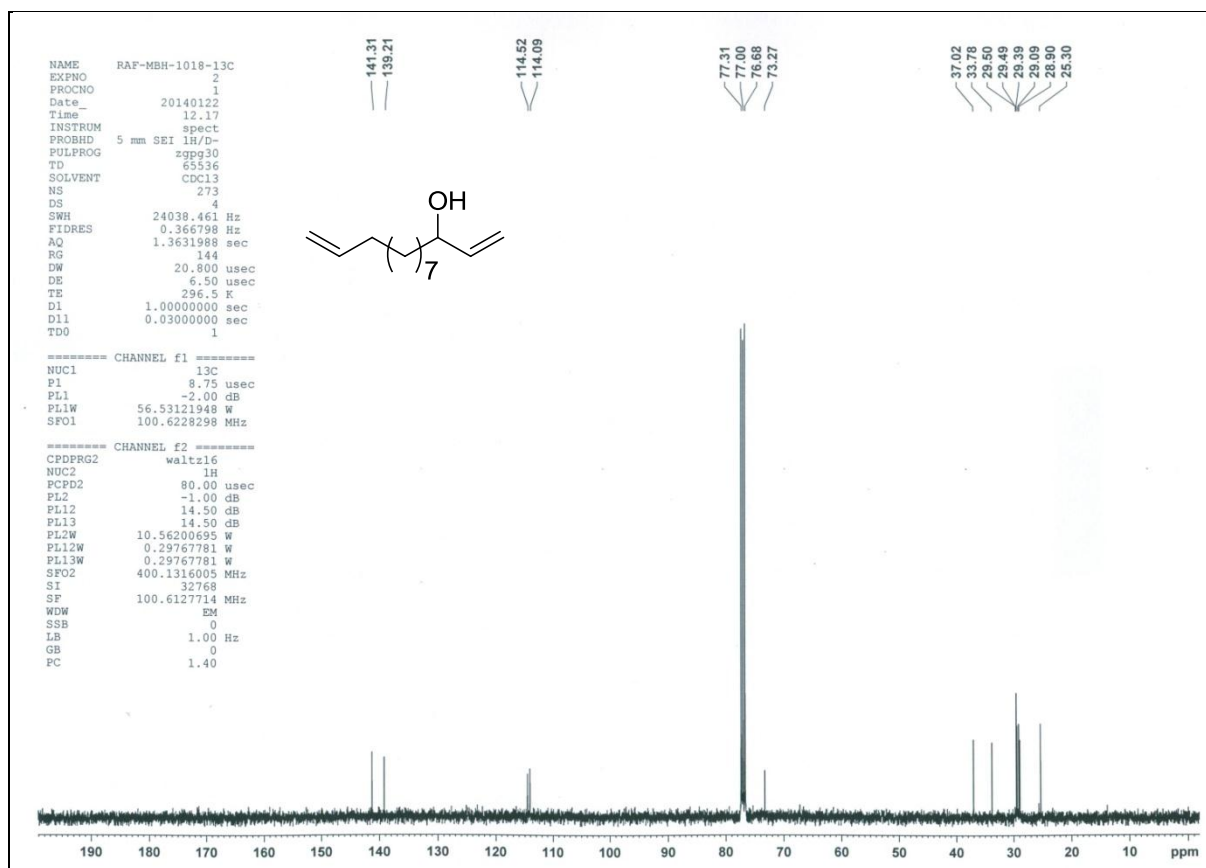

<sup>1</sup>H NMR (400 MHz, CDCl<sub>3</sub>/TMS) and <sup>13</sup>C NMR (100 MHz, CDCl<sub>3</sub>) of Compound **9e**

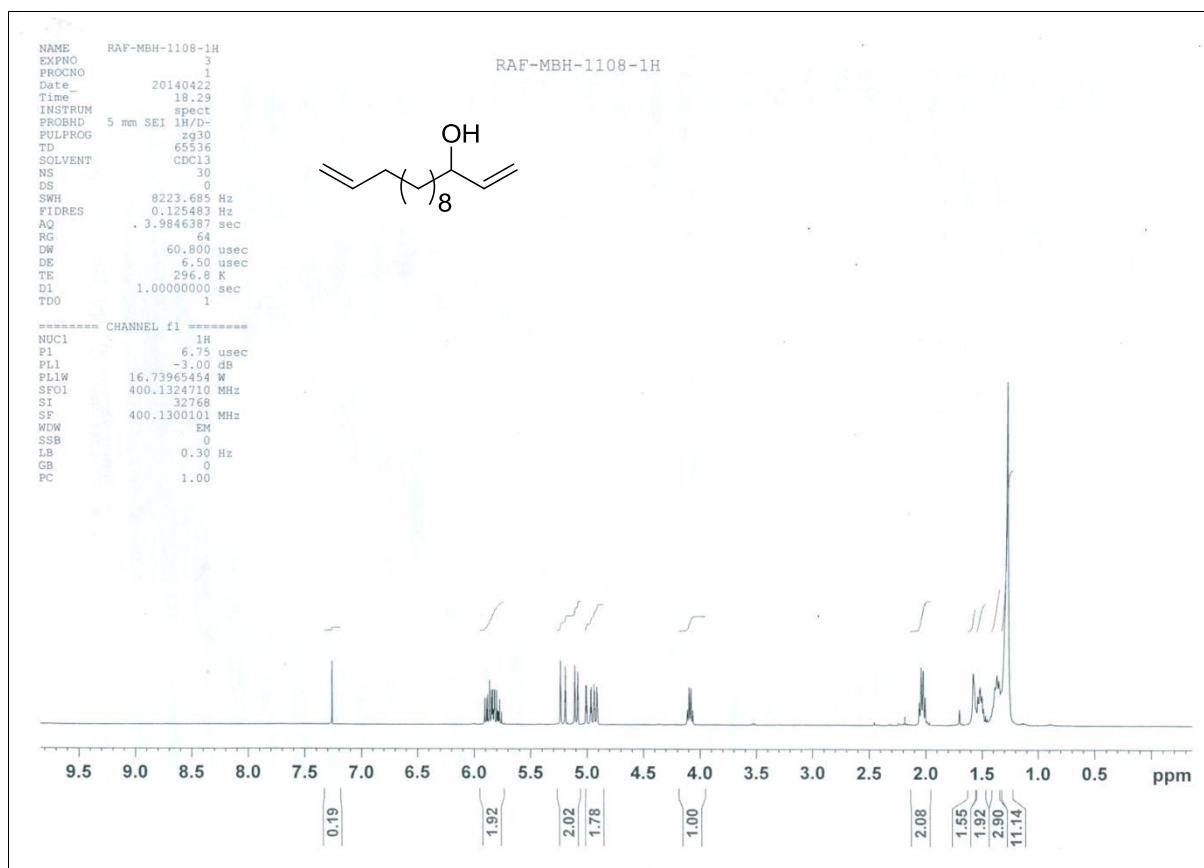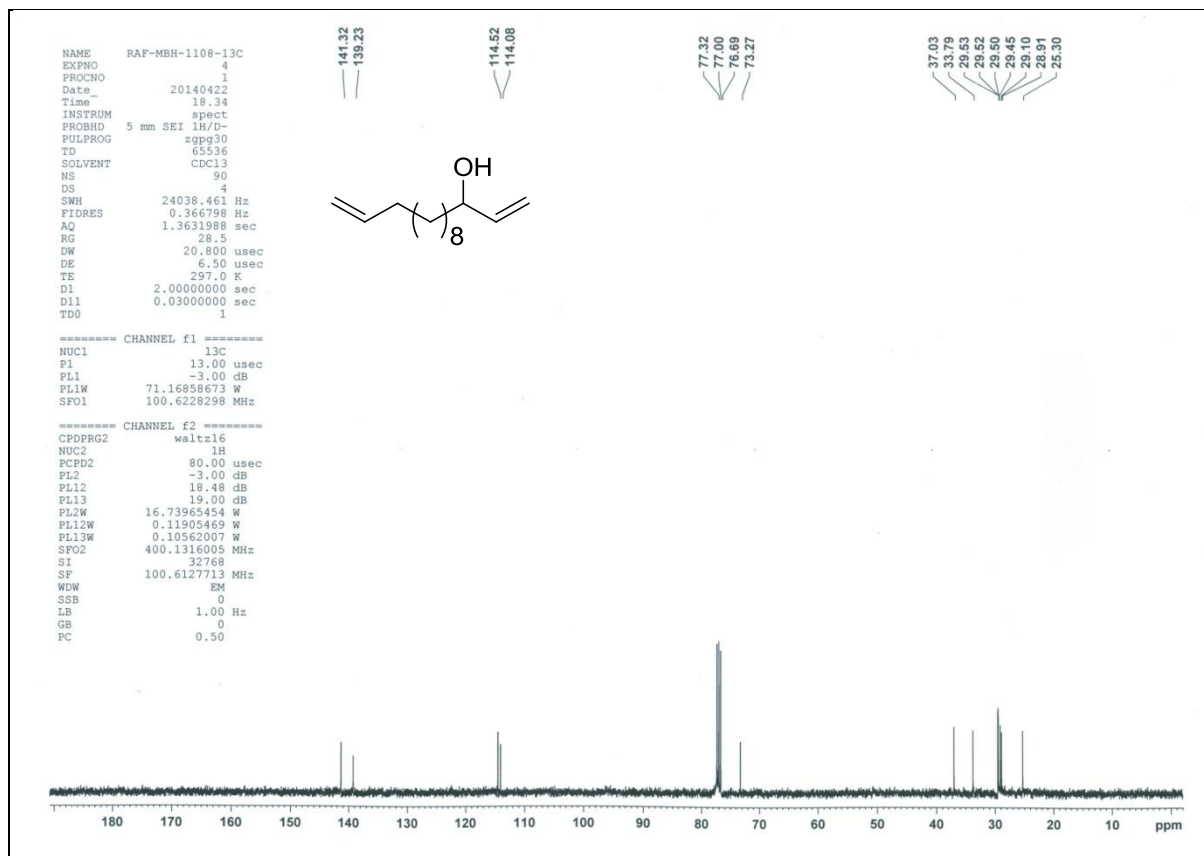

<sup>1</sup>H NMR (400 MHz, CDCl<sub>3</sub>/TMS) and <sup>13</sup>C NMR (100 MHz, CDCl<sub>3</sub>) of Compound 5a

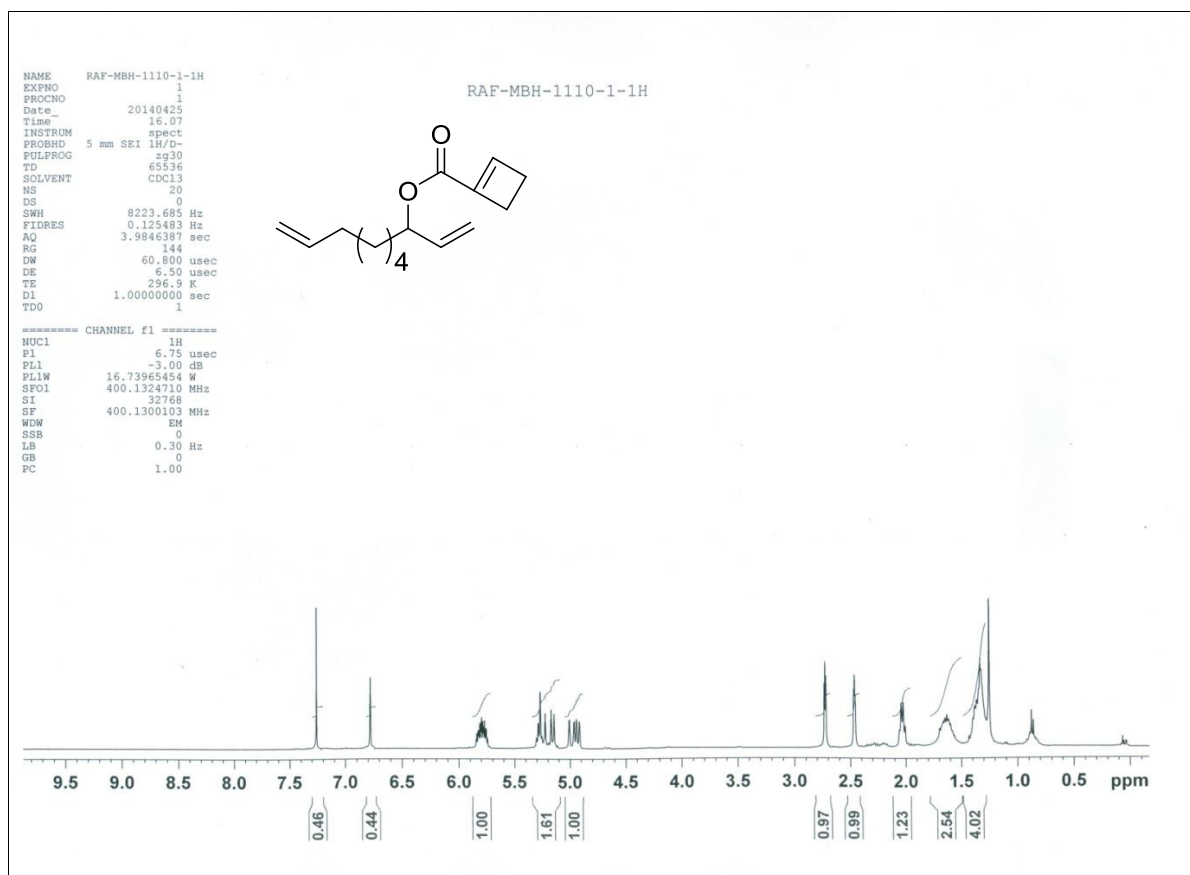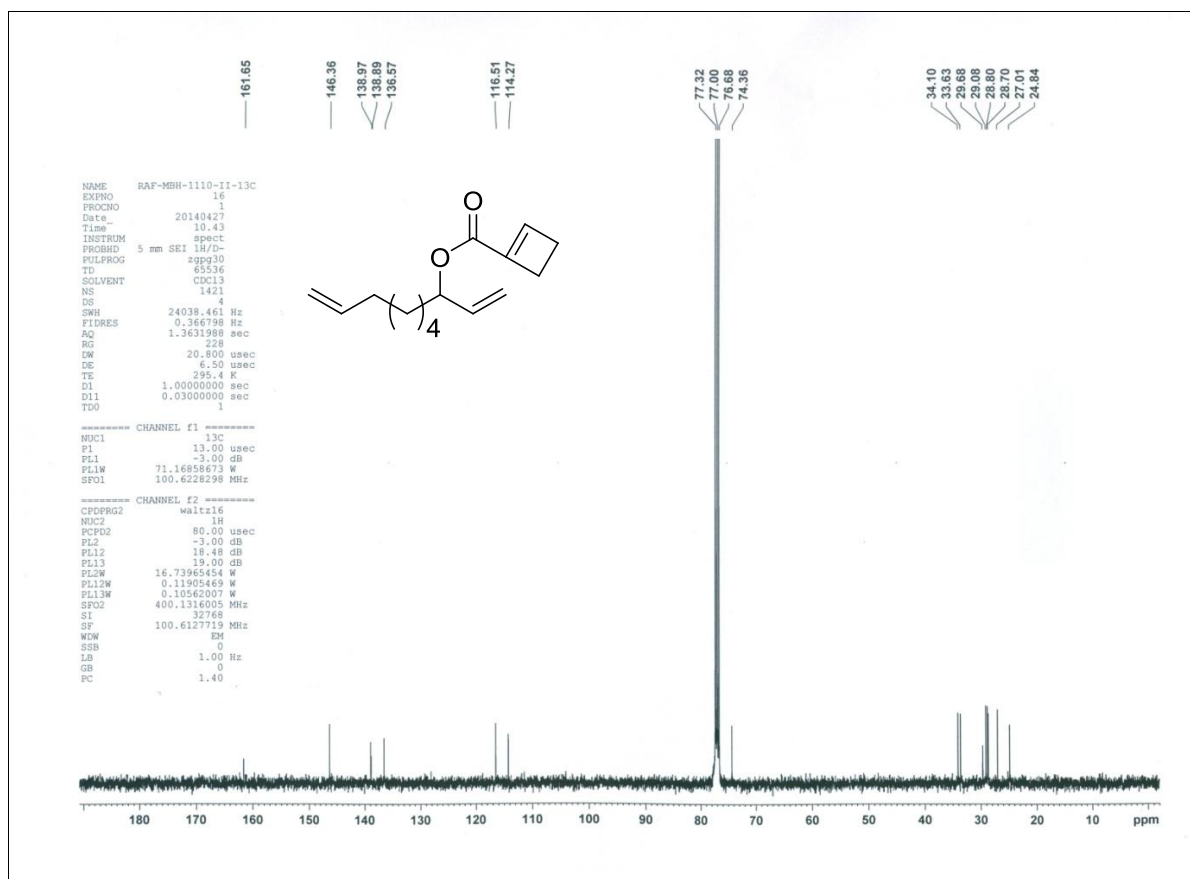

<sup>1</sup>H NMR (500 MHz, CDCl<sub>3</sub>/TMS) and <sup>13</sup>C NMR (125 MHz, CDCl<sub>3</sub>) of Compound **5b**

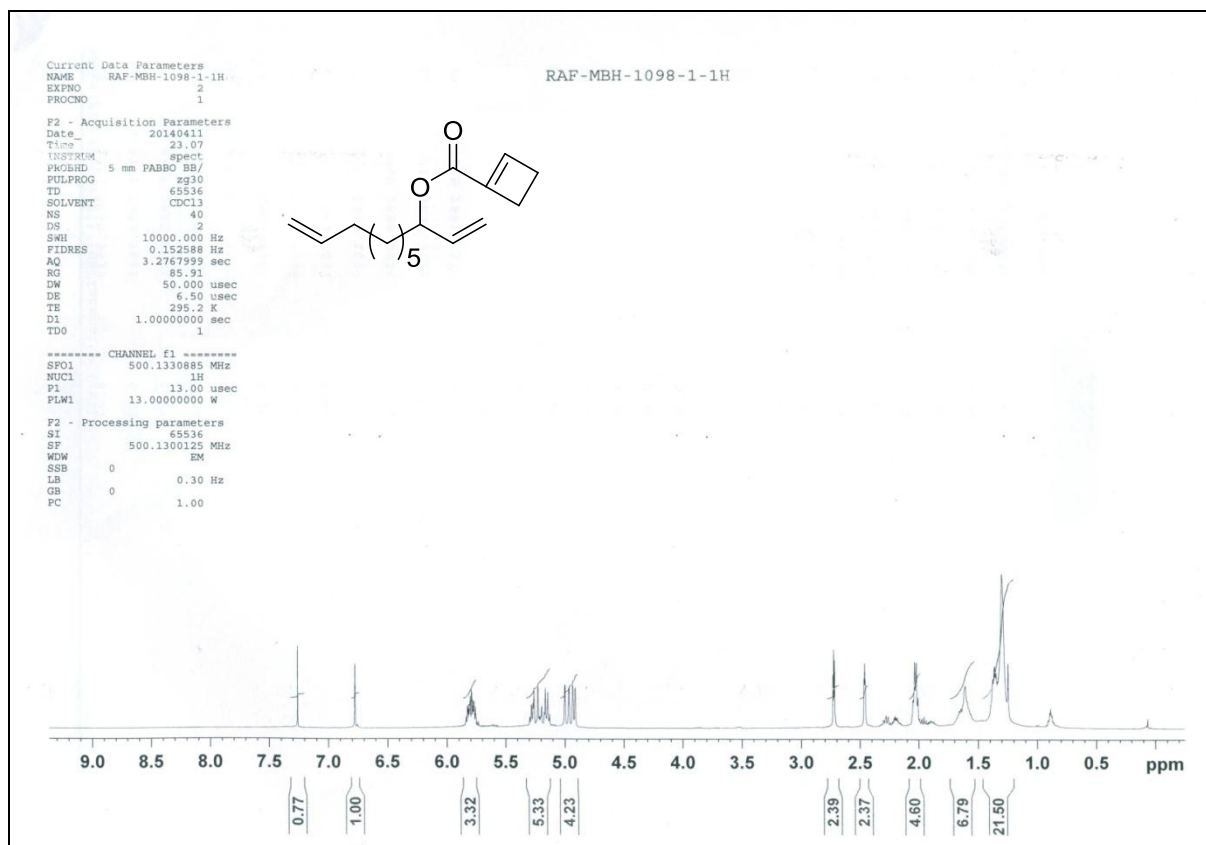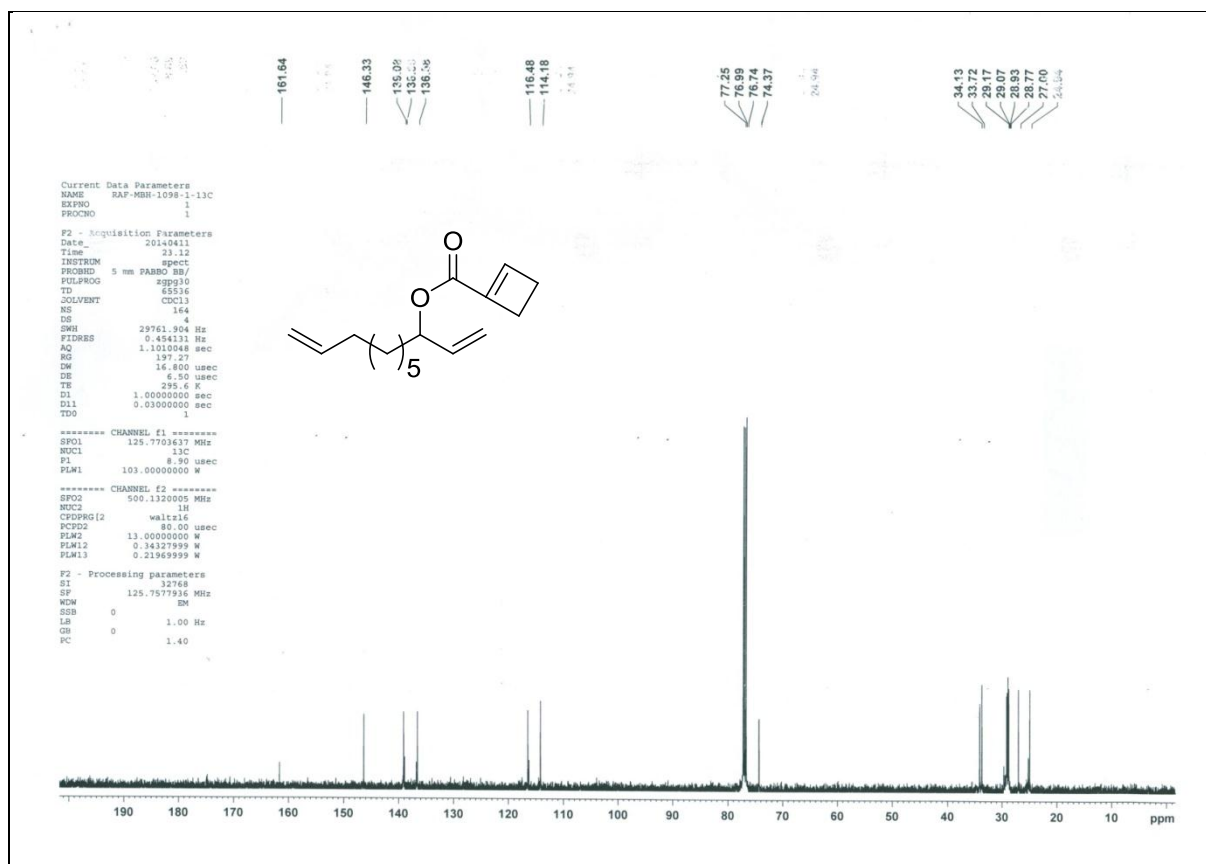



<sup>1</sup>H NMR (400 MHz, CDCl<sub>3</sub>/TMS) and <sup>13</sup>C NMR (100 MHz, CDCl<sub>3</sub>) of Compound **5c**

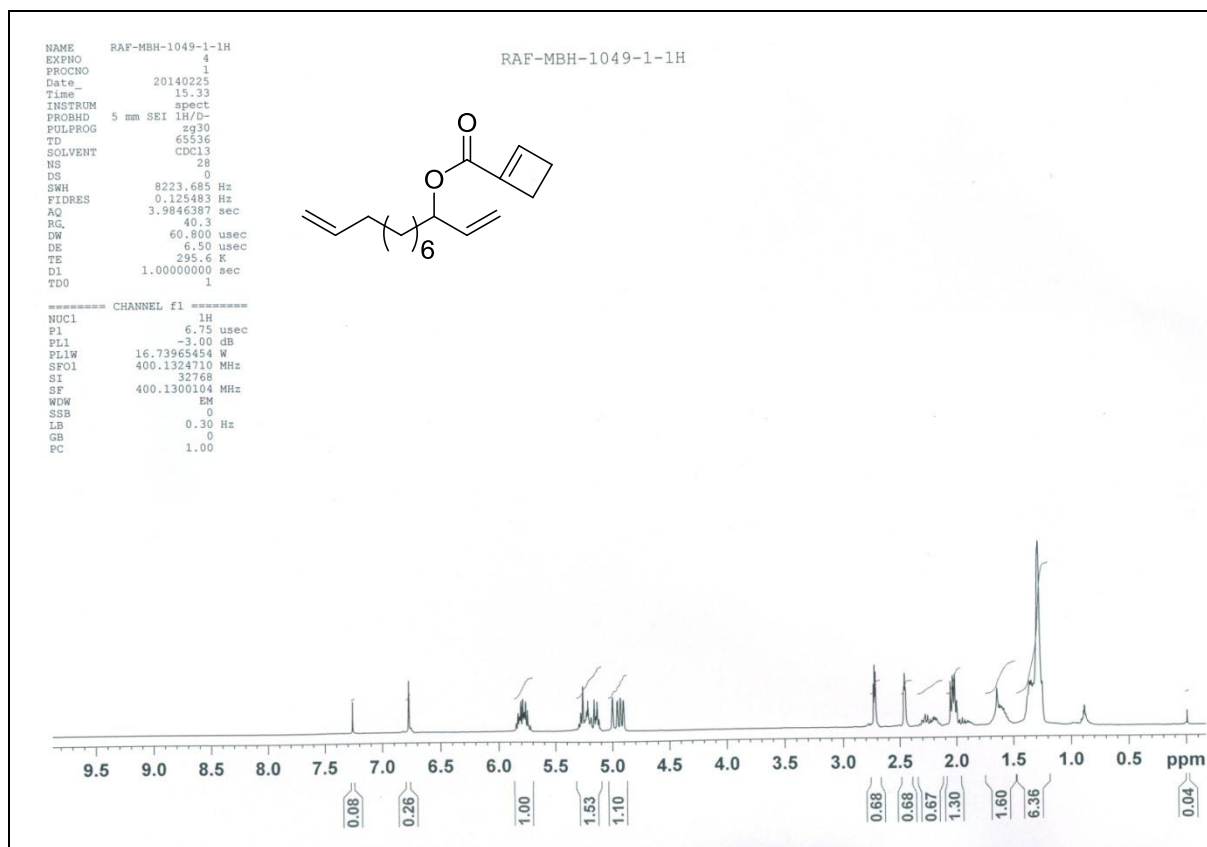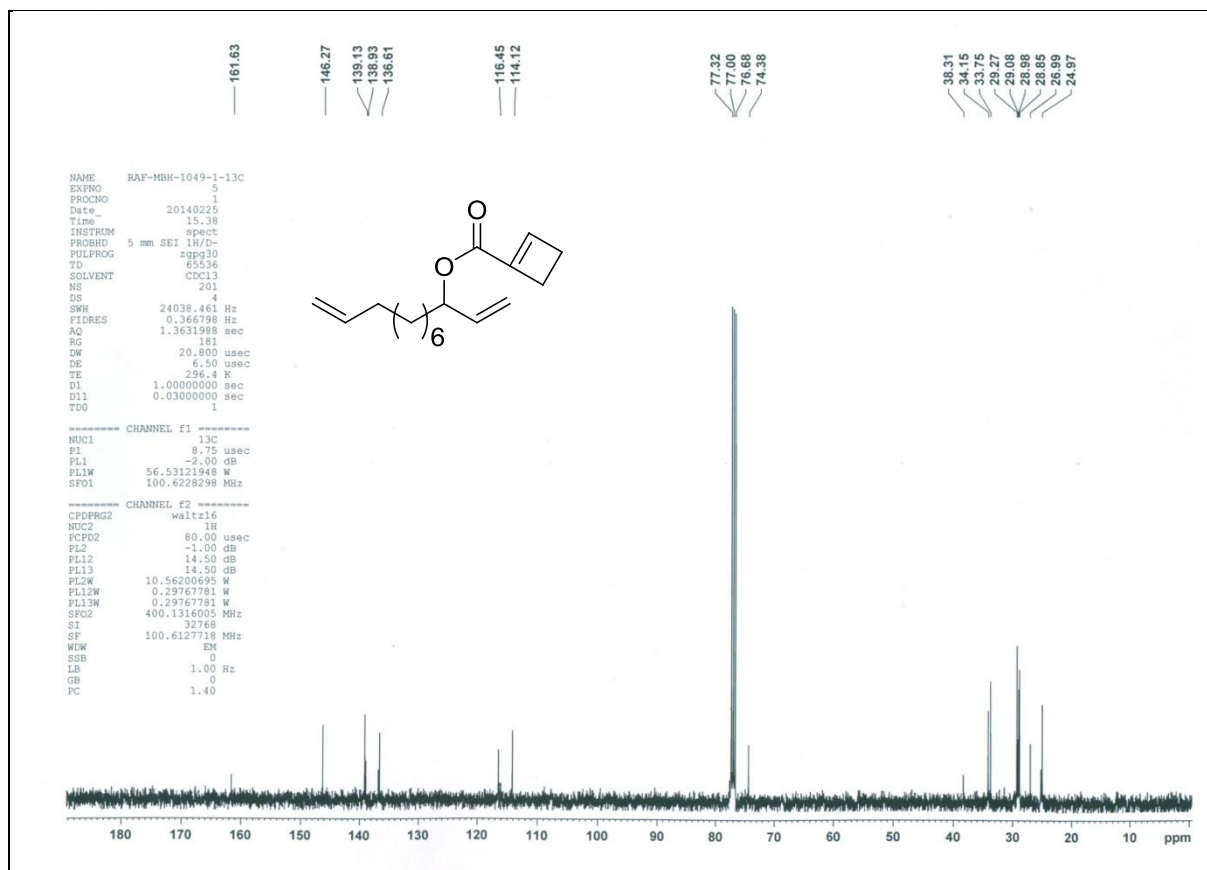

$^1\text{H}$  NMR (400 MHz,  $\text{CDCl}_3/\text{TMS}$ ) and  $^{13}\text{C}$  NMR (100 MHz,  $\text{CDCl}_3$ ) of Compound **5d**

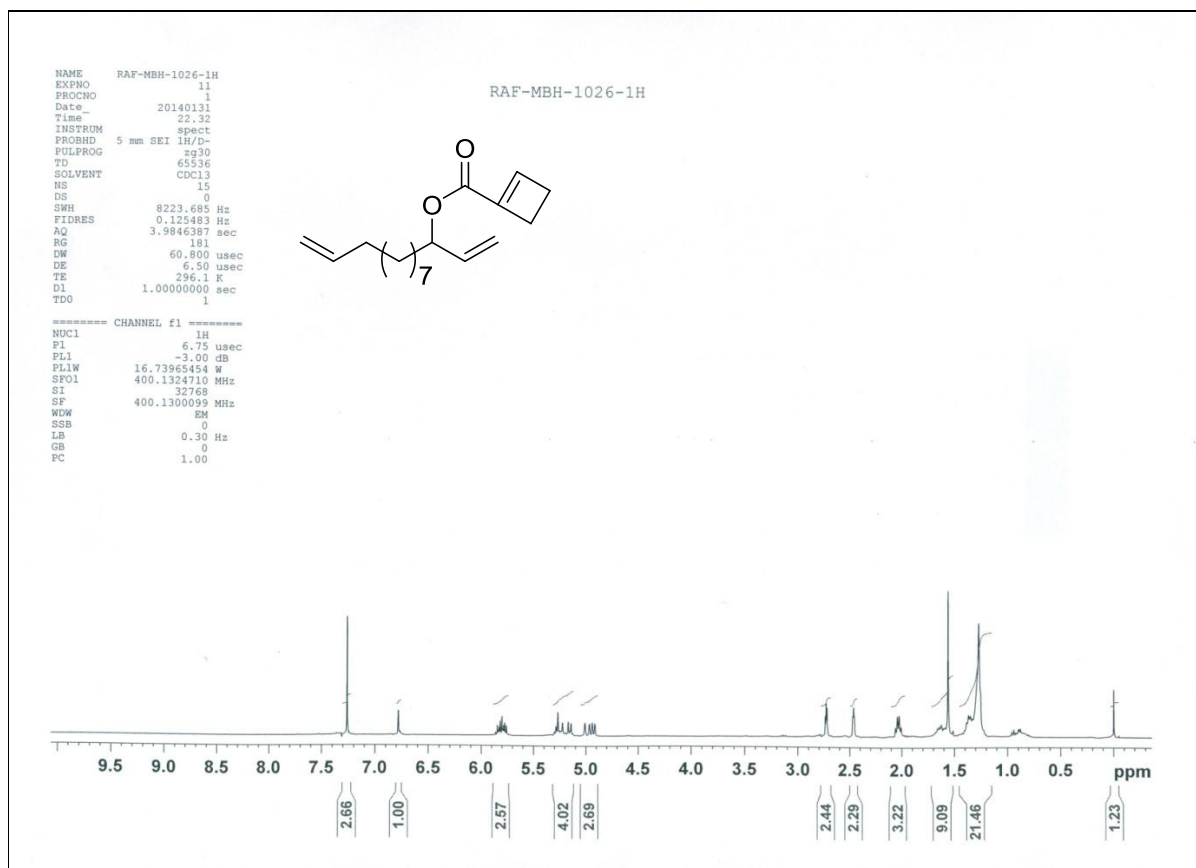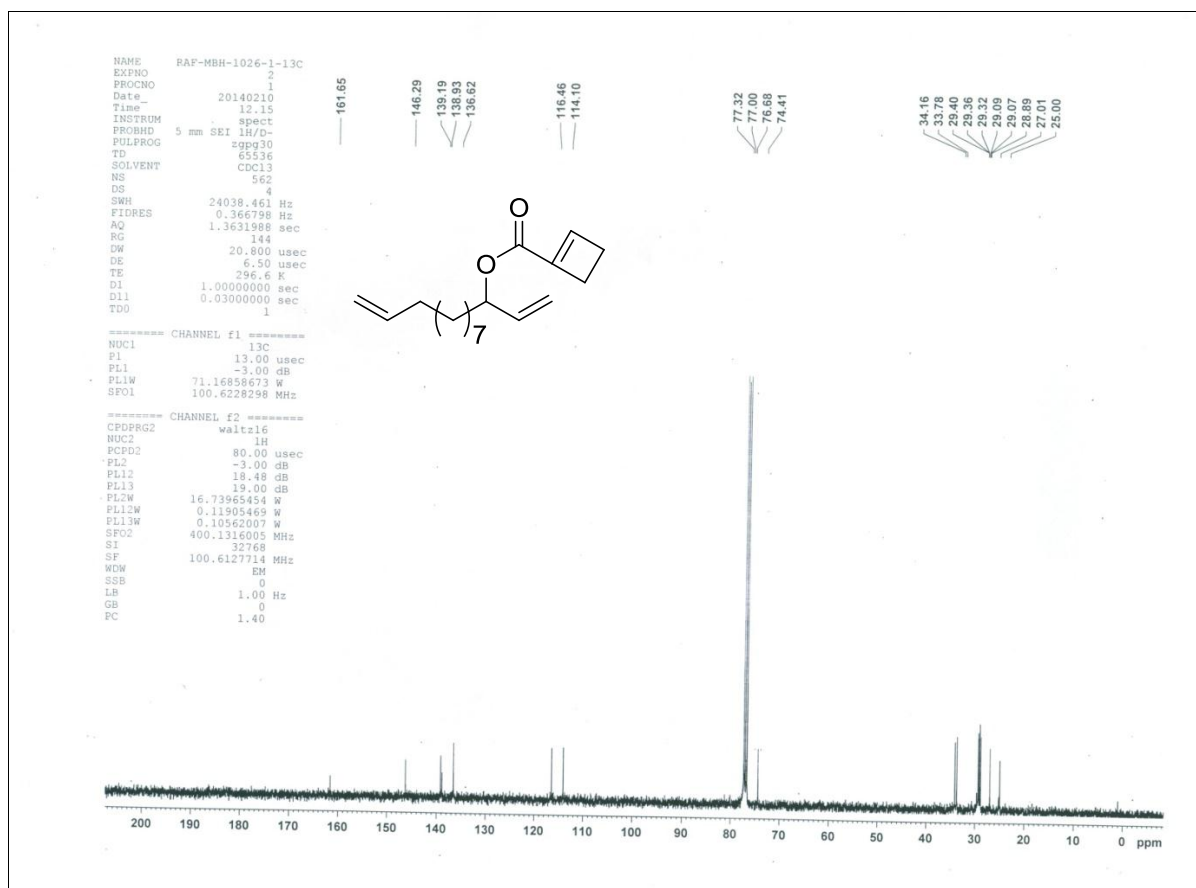

$^1\text{H}$  NMR (400 MHz,  $\text{CDCl}_3/\text{TMS}$ ) and  $^{13}\text{C}$  NMR (100 MHz,  $\text{CDCl}_3$ ) of Compound **5e**

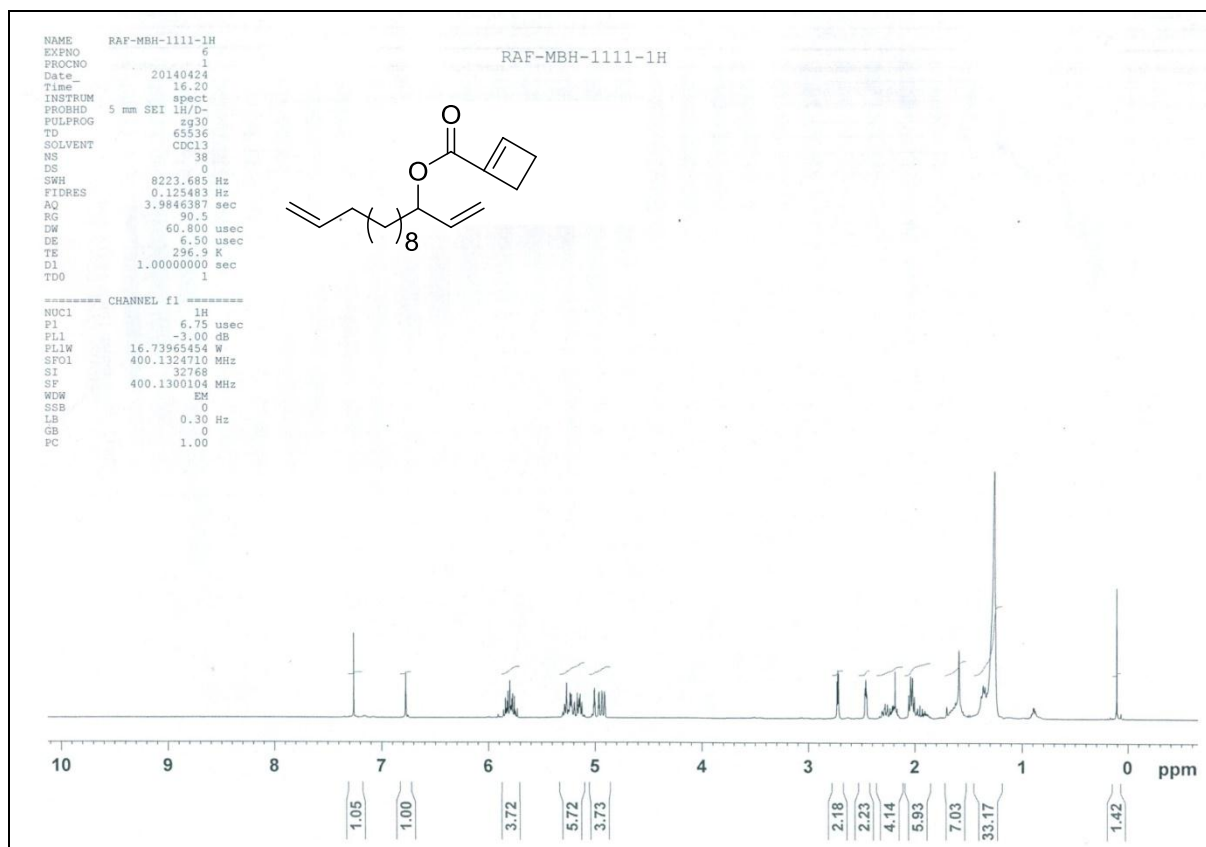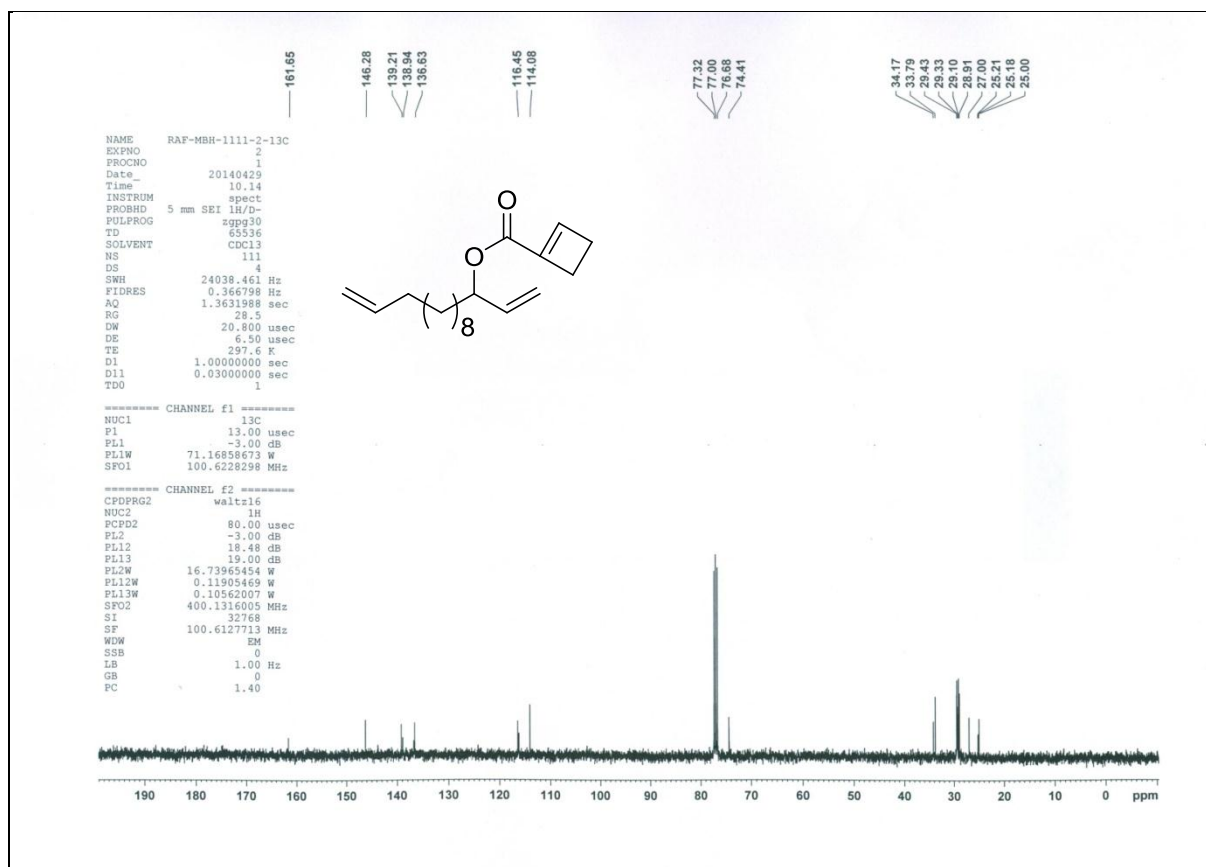

<sup>1</sup>H NMR (500 MHz, CDCl<sub>3</sub>/TMS) and <sup>13</sup>C NMR (125 MHz, CDCl<sub>3</sub>) of Compound 1a

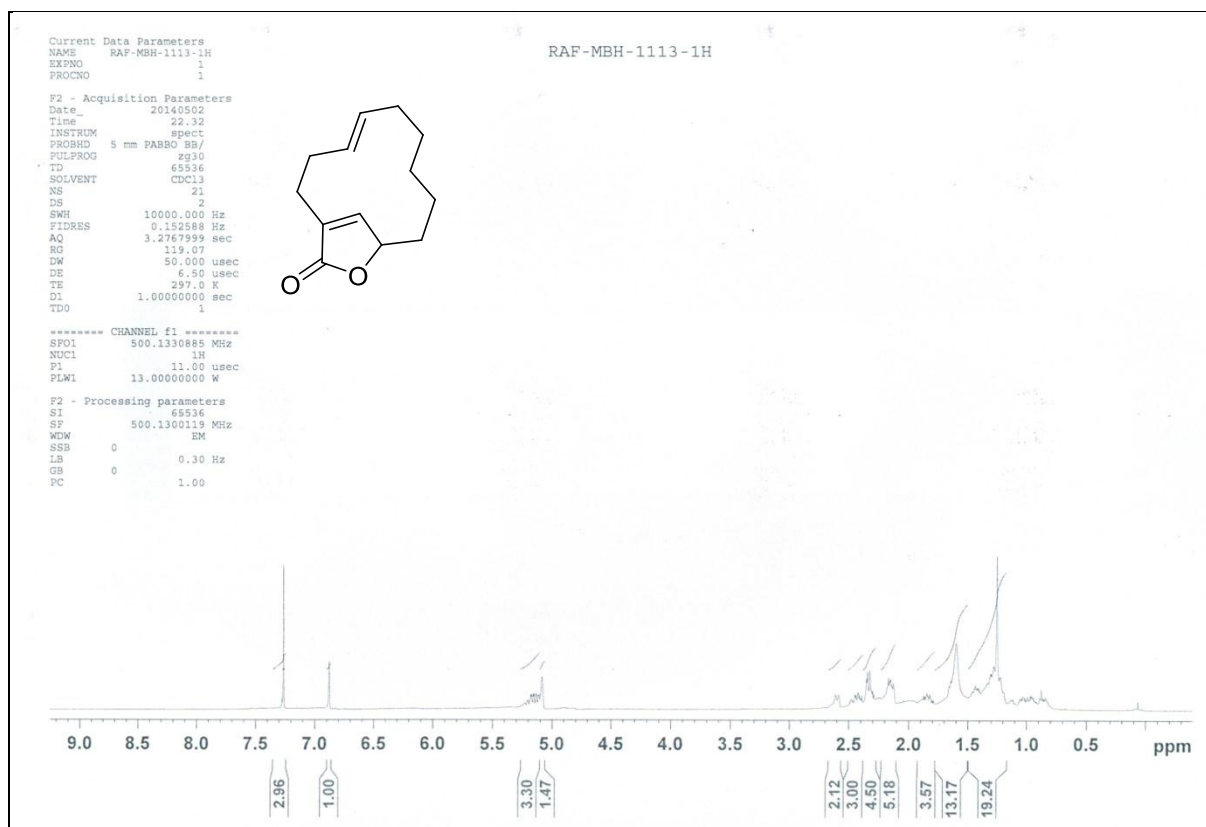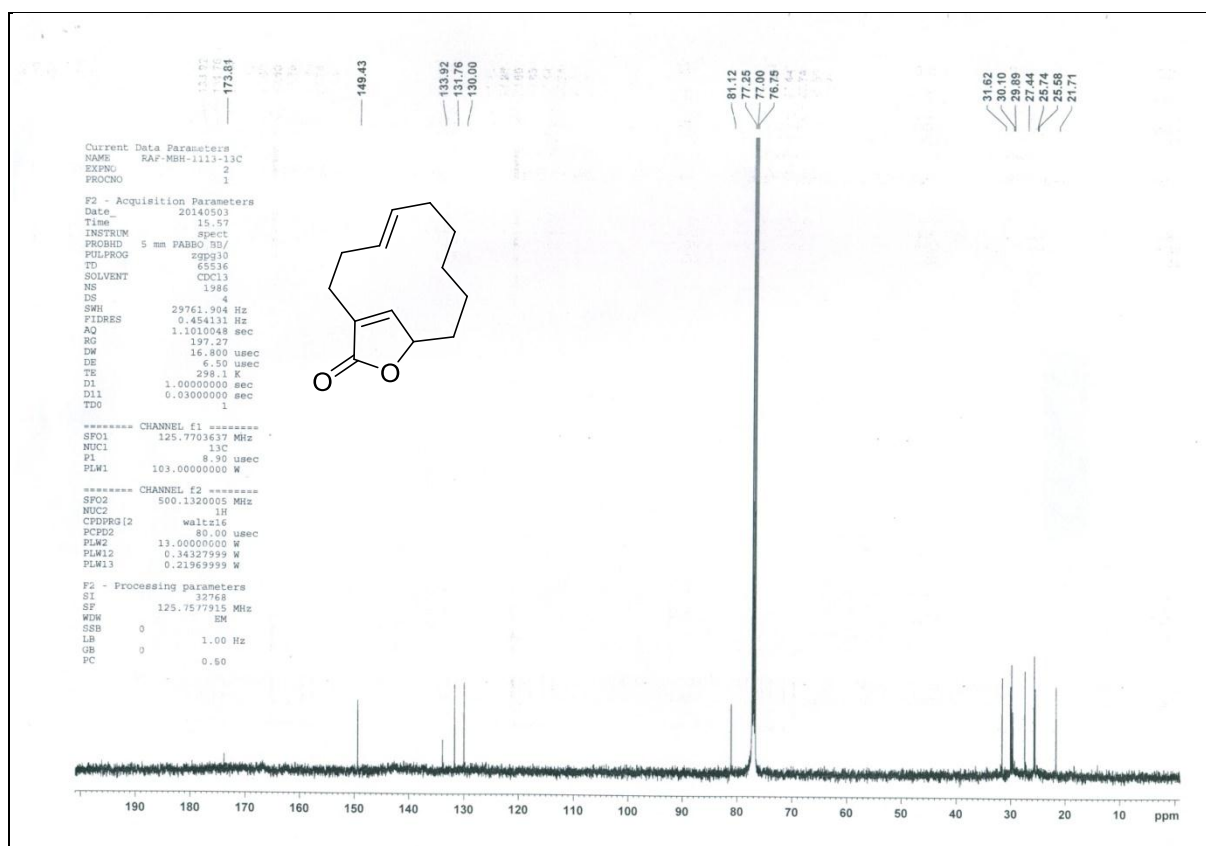

<sup>1</sup>H NMR (400 MHz, CDCl<sub>3</sub>/TMS) and <sup>13</sup>C NMR (125 MHz, CDCl<sub>3</sub>) of Compound **1b**

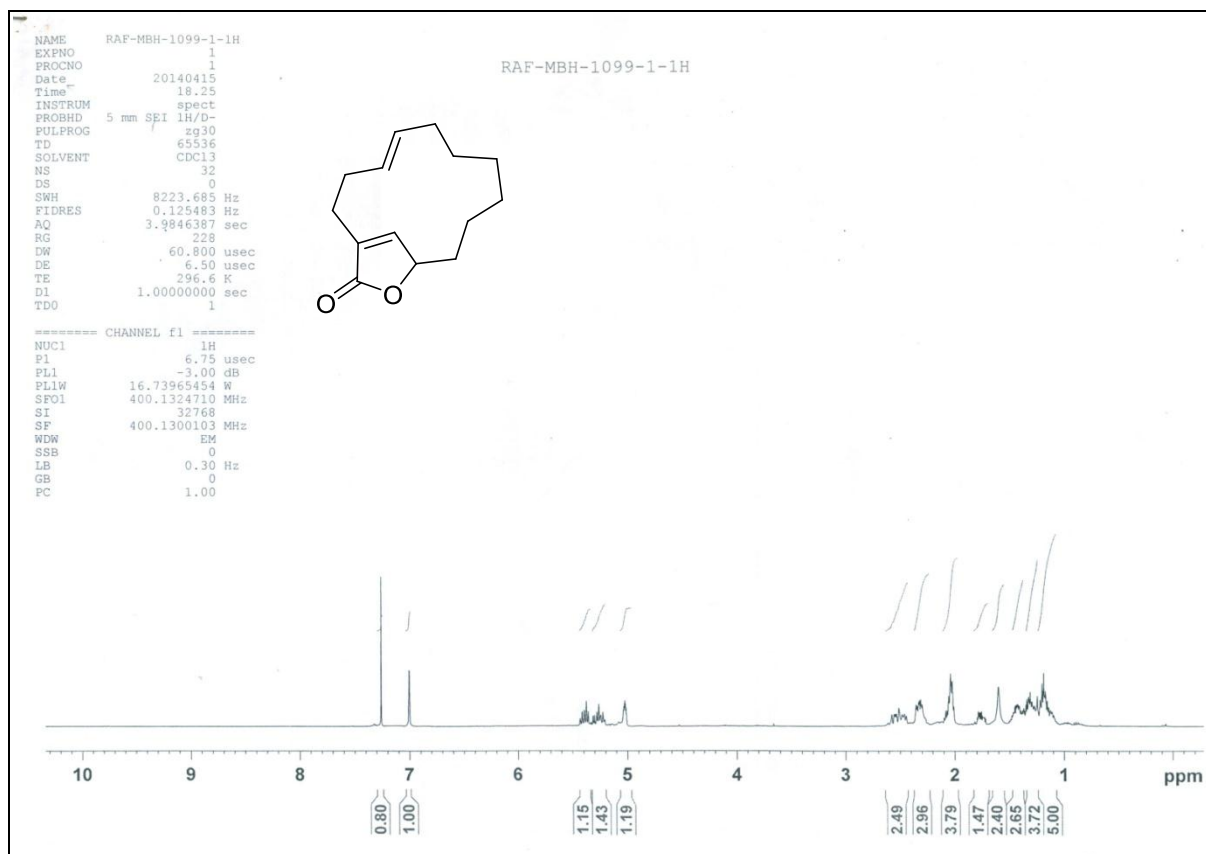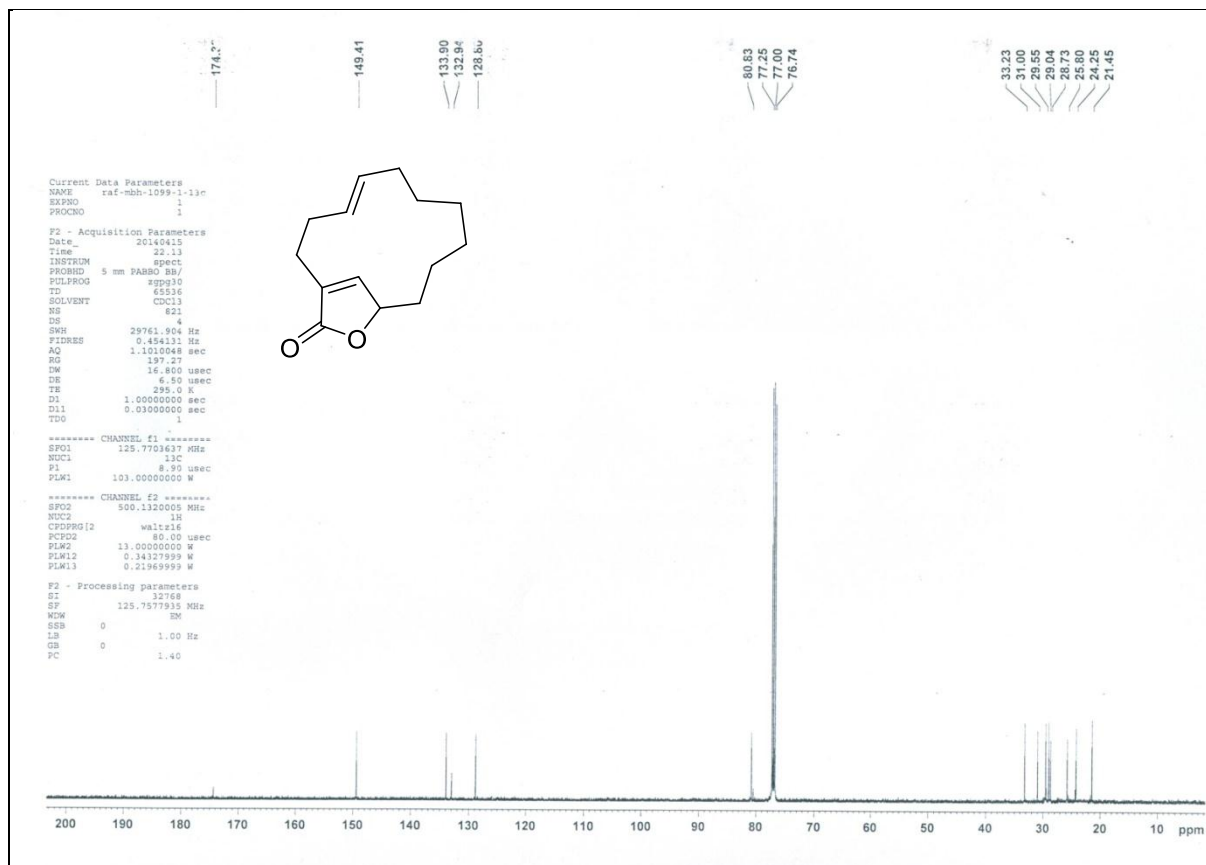

<sup>1</sup>H NMR (400 MHz, CDCl<sub>3</sub>/TMS) and <sup>13</sup>C NMR (100 MHz, CDCl<sub>3</sub>) of Compound **1c**

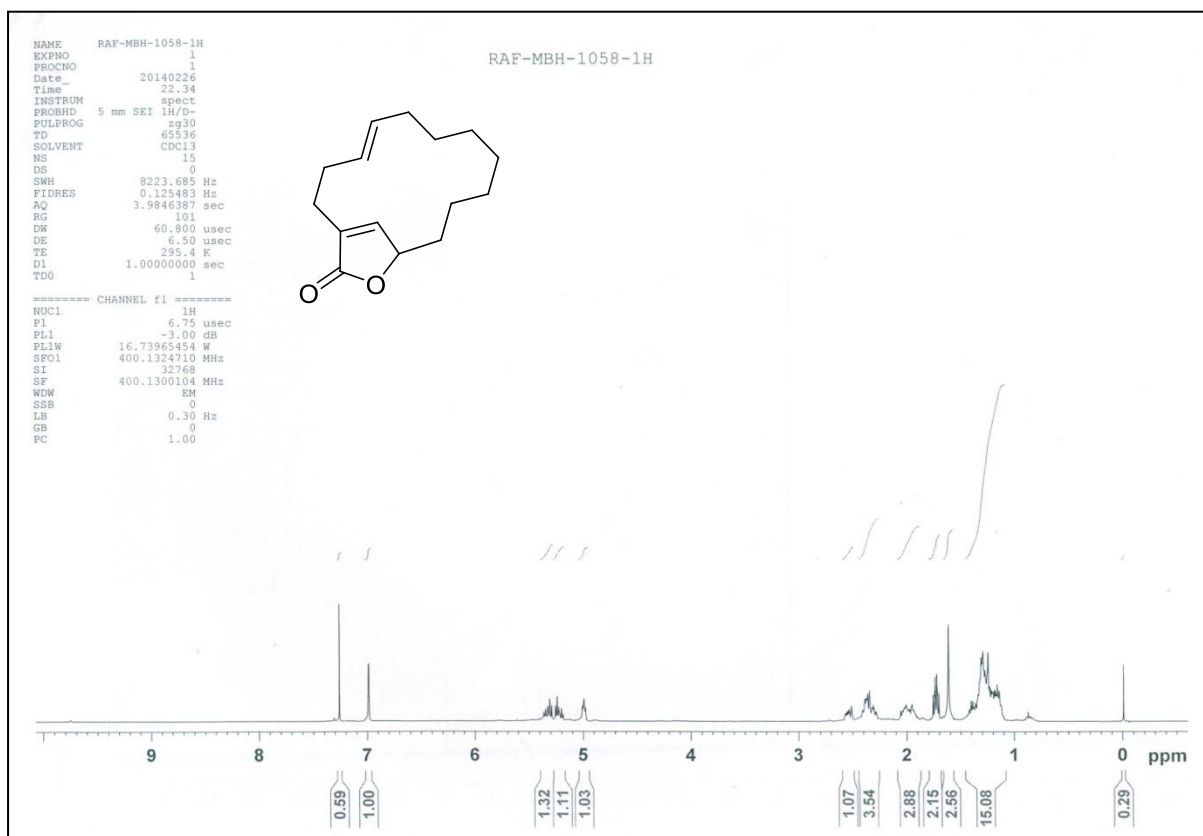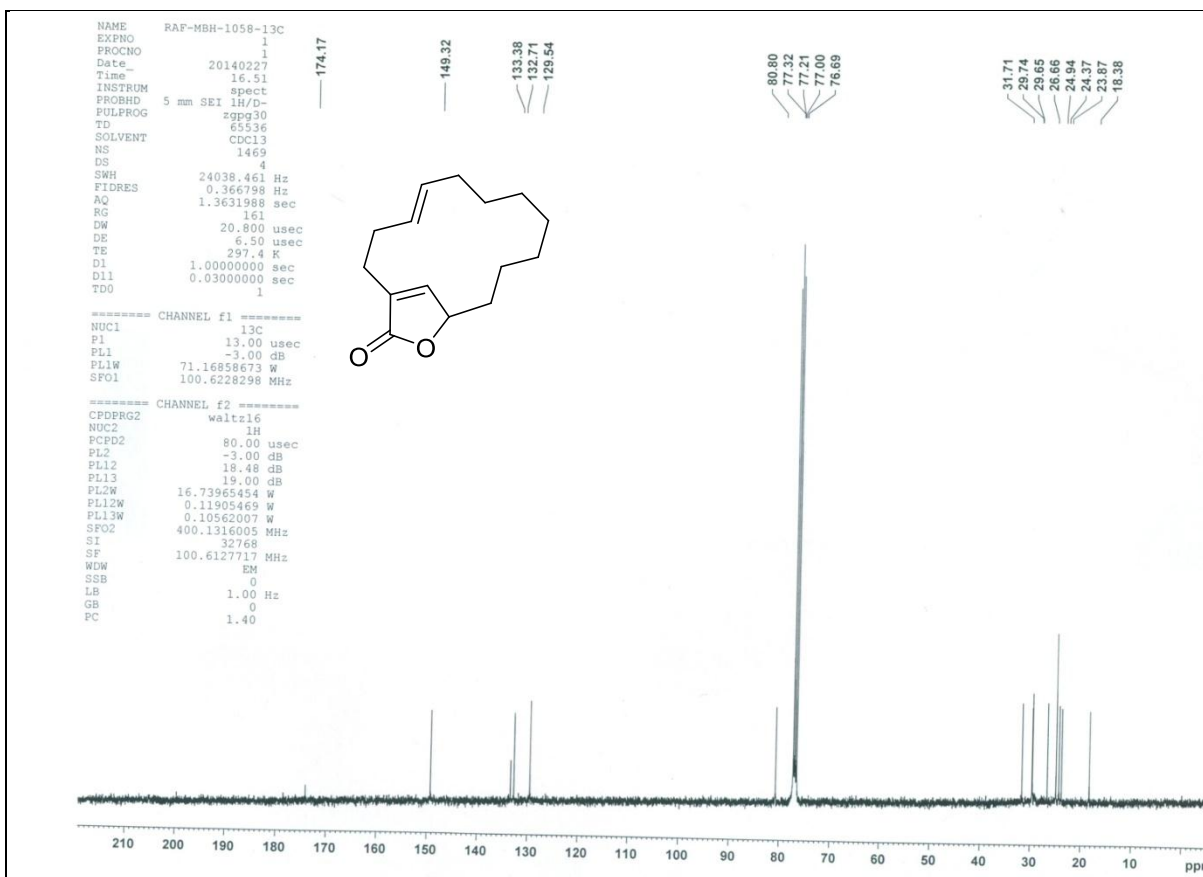

<sup>1</sup>H NMR (400 MHz, CDCl<sub>3</sub>/TMS) and <sup>13</sup>C NMR (125 MHz, CDCl<sub>3</sub>) of Compound **1d**

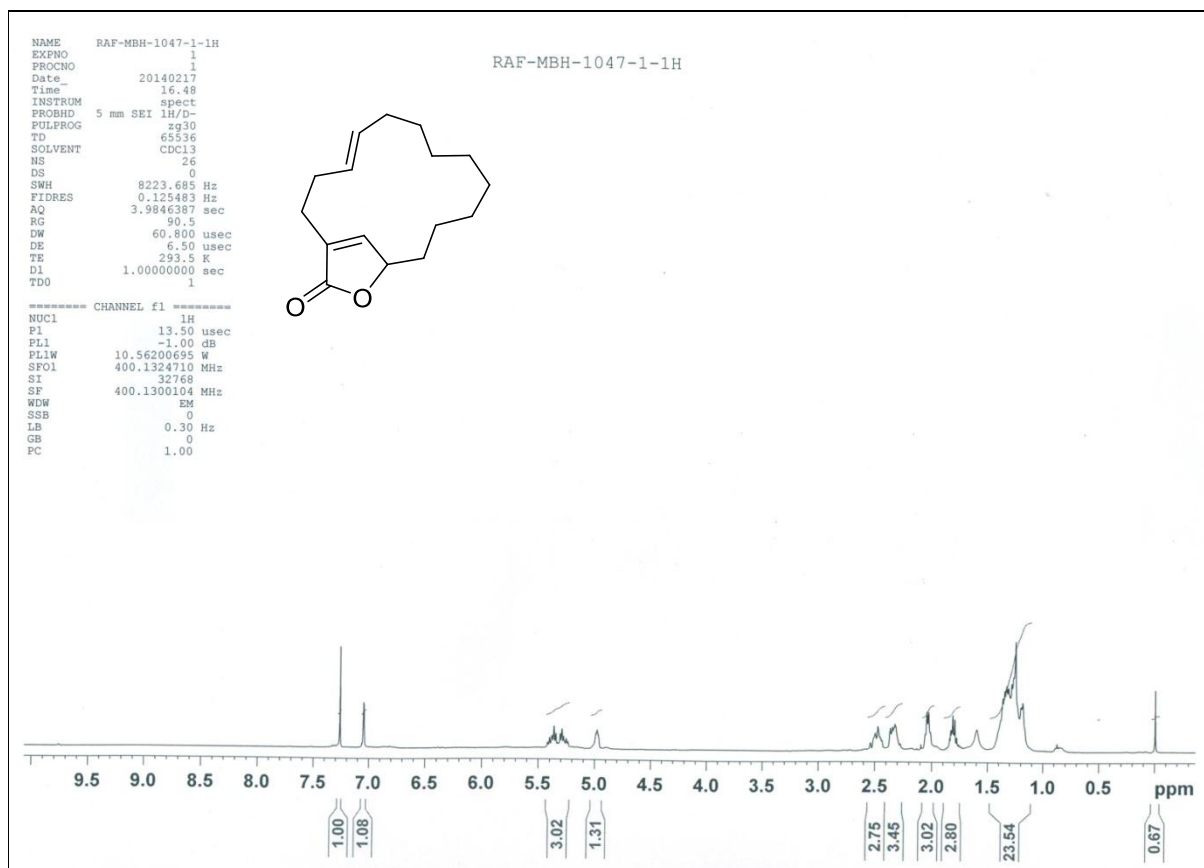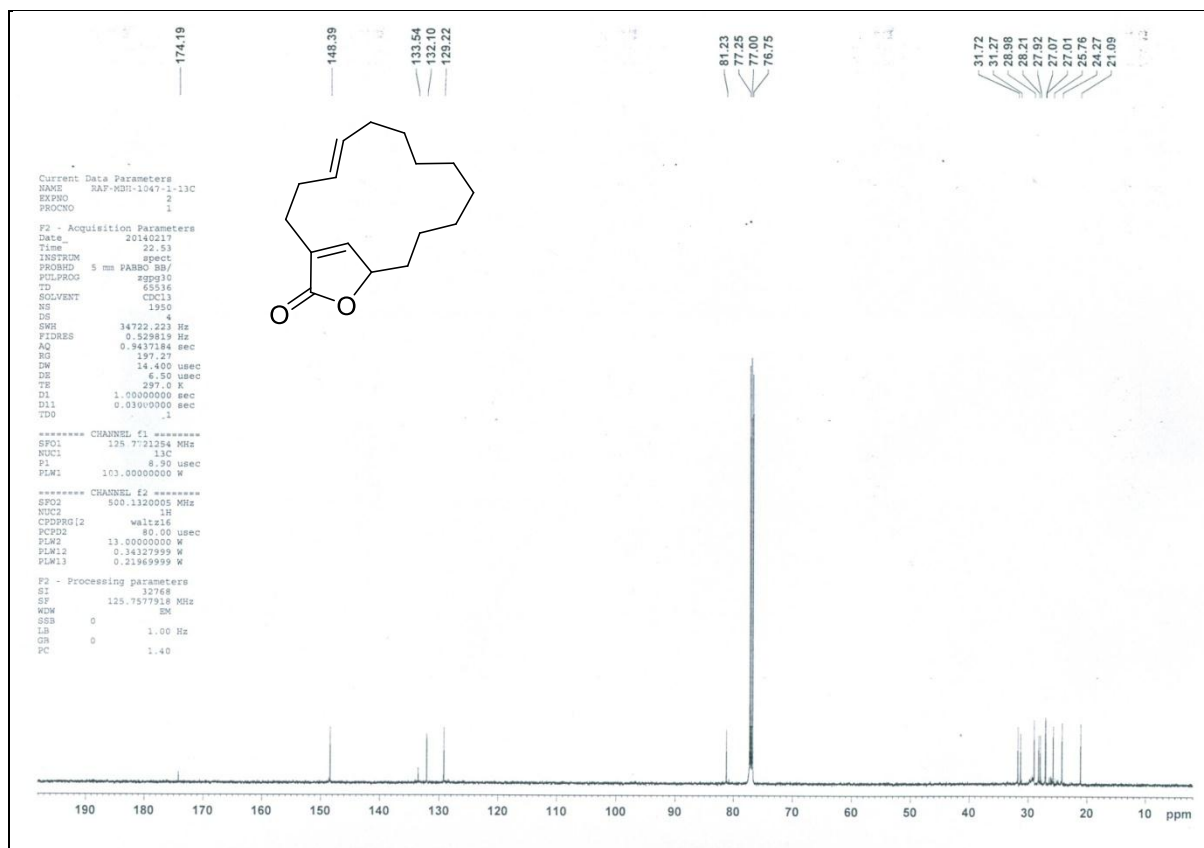

$^1\text{H}$  NMR (400 MHz,  $\text{CDCl}_3/\text{TMS}$ ) and  $^{13}\text{C}$  NMR (100 MHz,  $\text{CDCl}_3$ ) of Compound **1e**

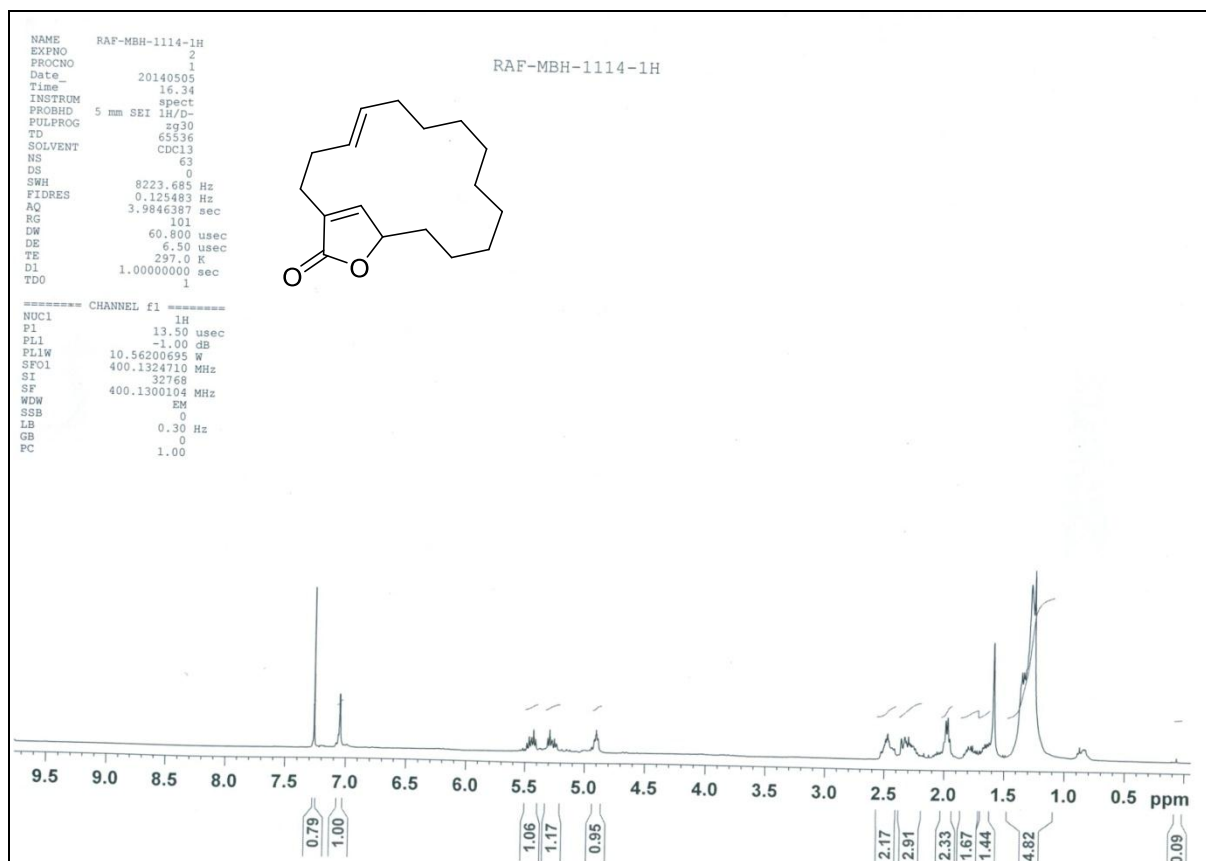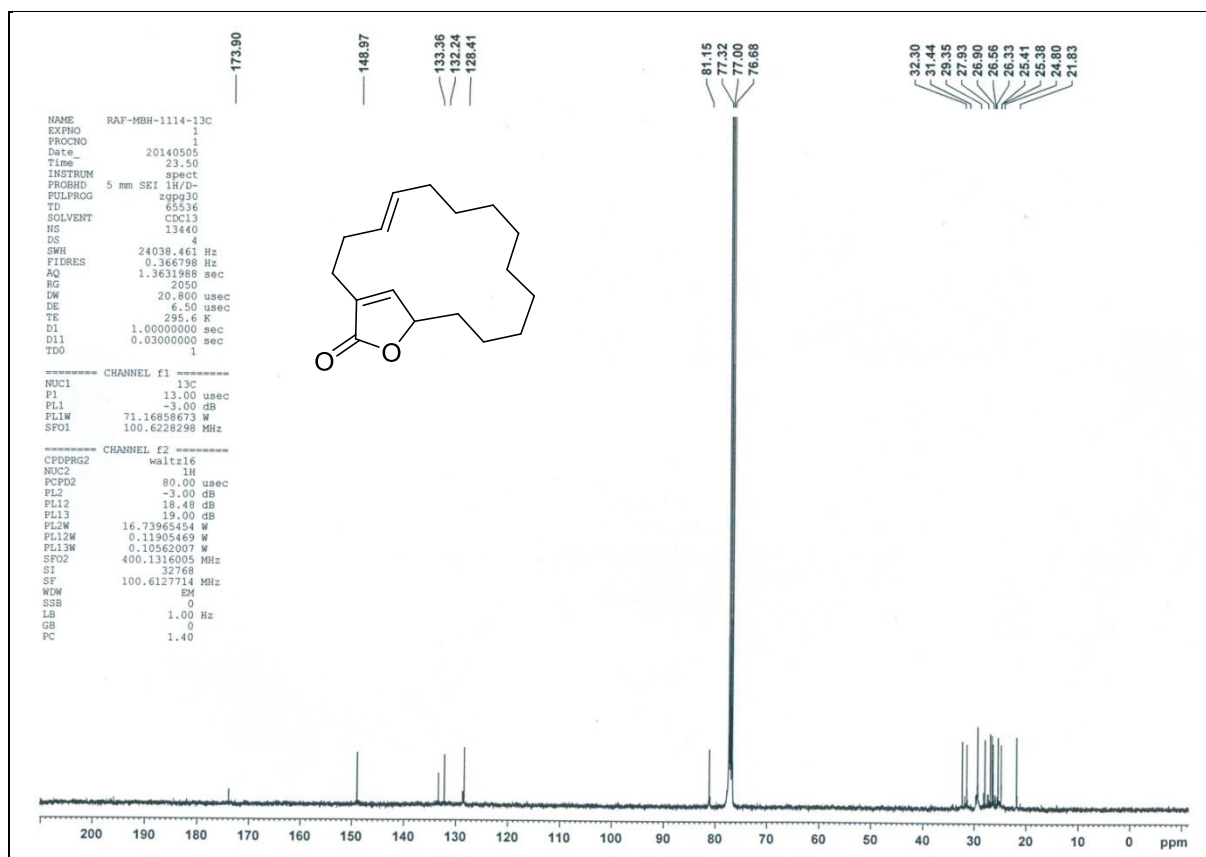



<sup>1</sup>H NMR (400 MHz, CDCl<sub>3</sub>/TMS) and <sup>13</sup>C NMR (100 MHz, CDCl<sub>3</sub>) of Compound 13

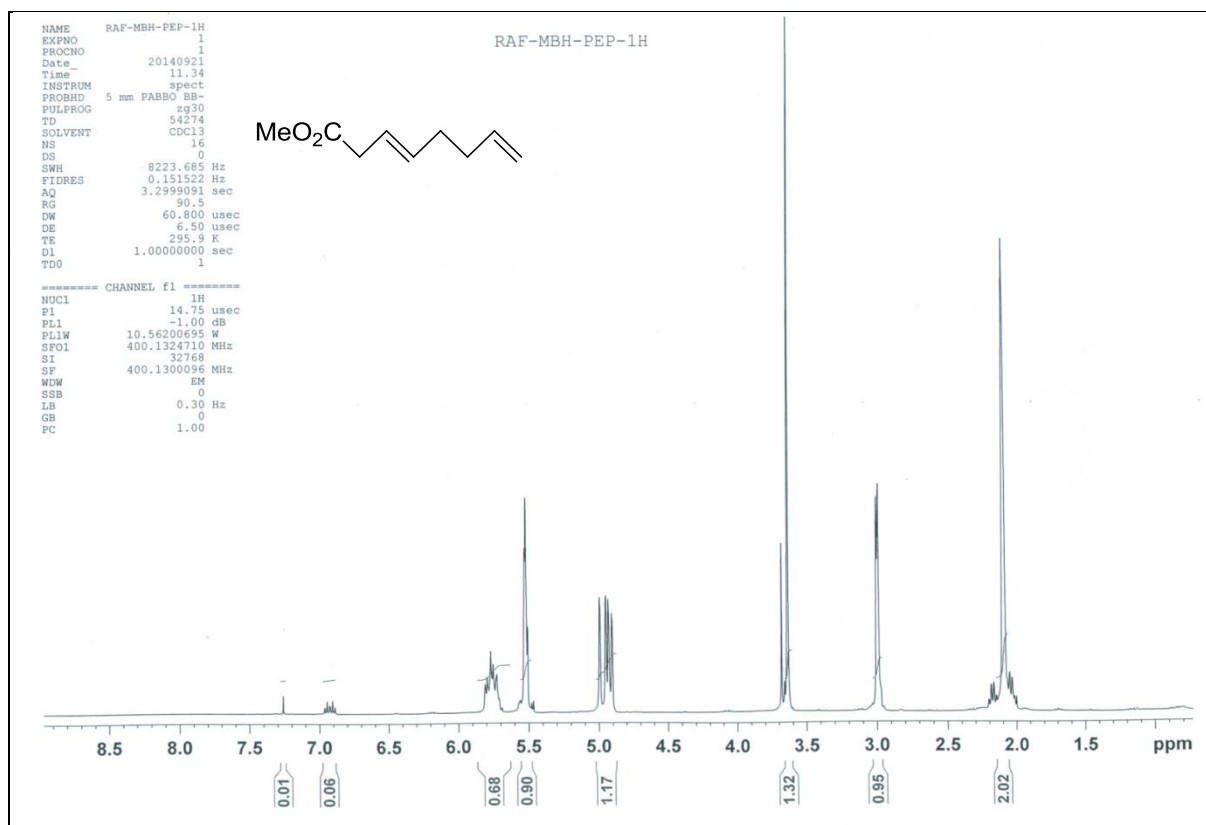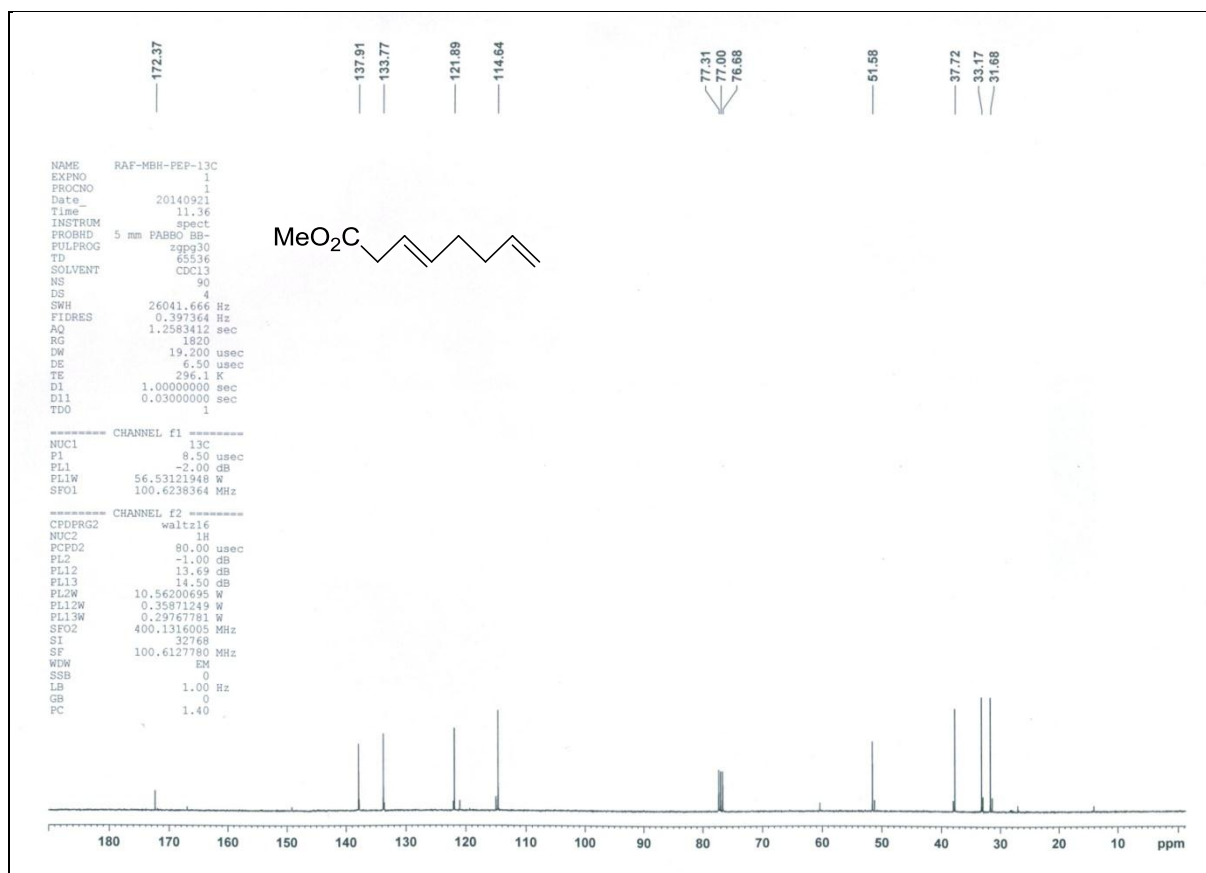

<sup>1</sup>H NMR (400 MHz, CDCl<sub>3</sub>/TMS) and <sup>13</sup>C NMR (125 MHz, CDCl<sub>3</sub>) of Compound **9f**

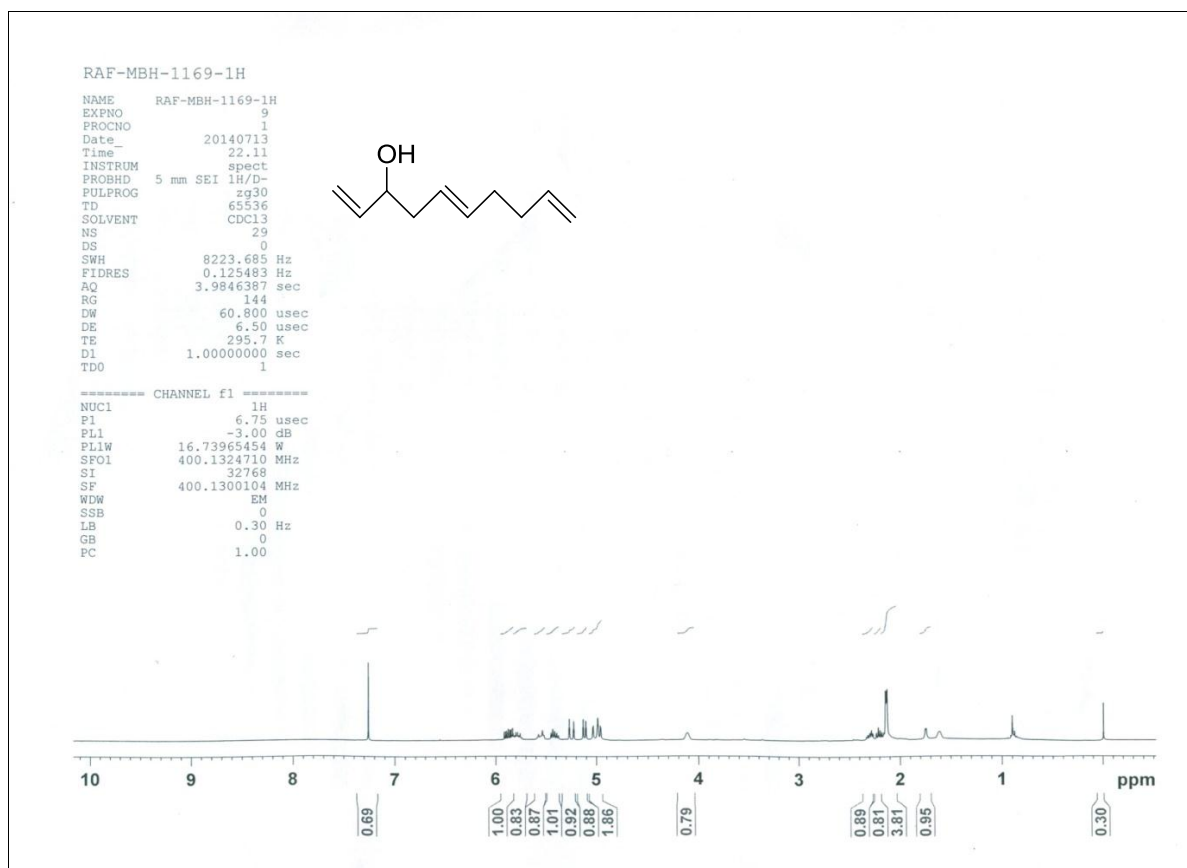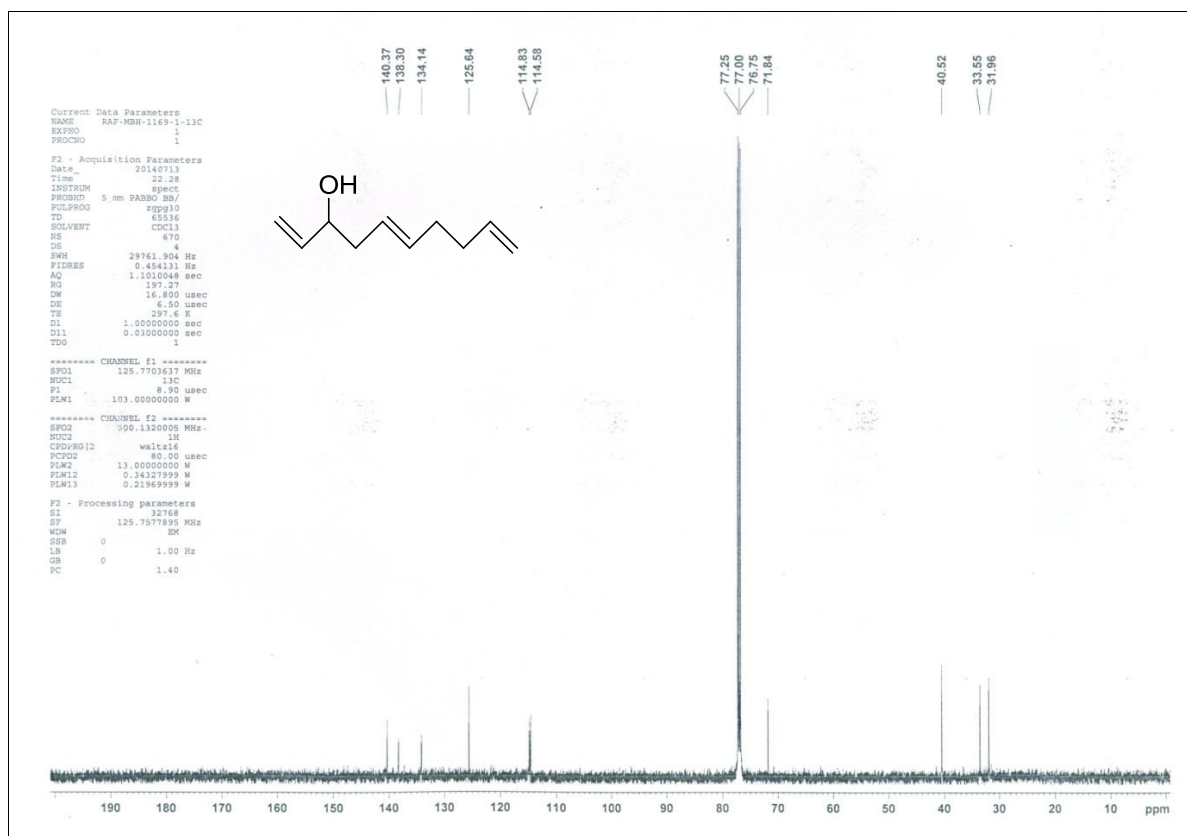

<sup>1</sup>H NMR (500 MHz, CDCl<sub>3</sub>/TMS) and <sup>13</sup>C NMR (125 MHz, CDCl<sub>3</sub>) of Compound **5f**

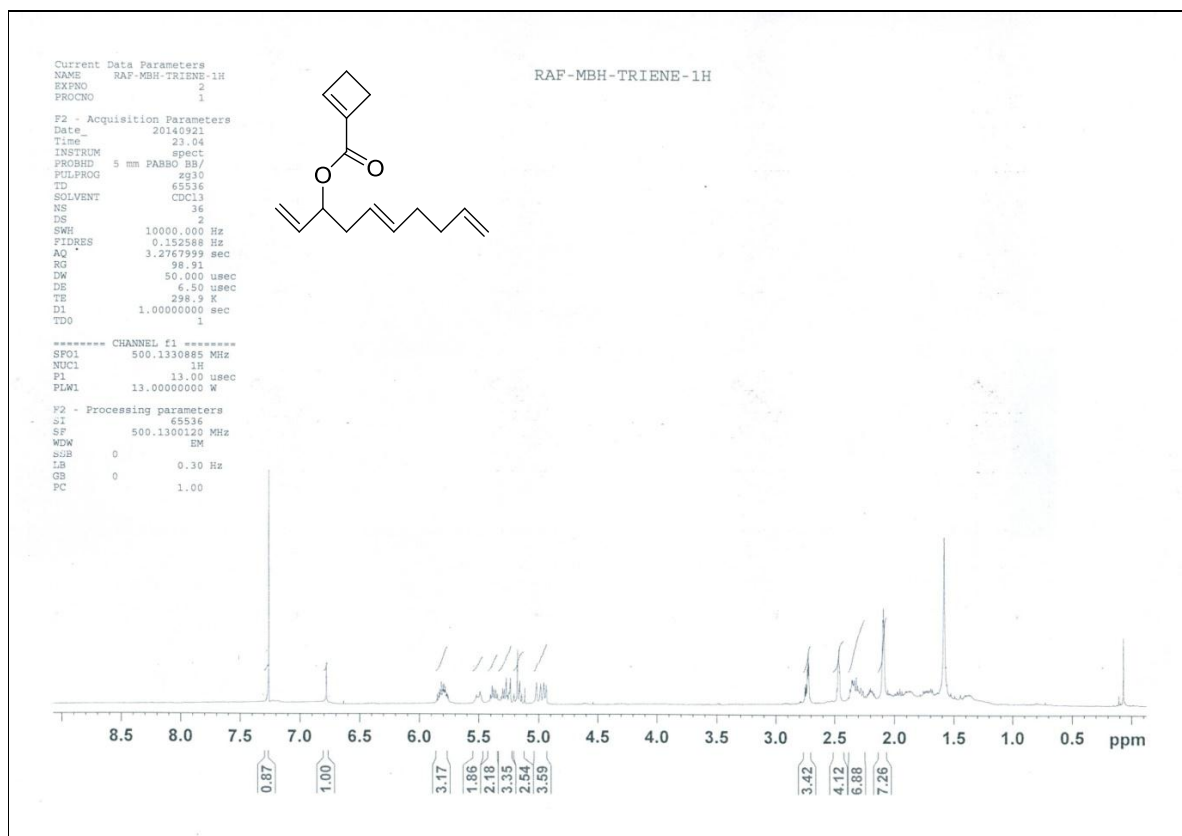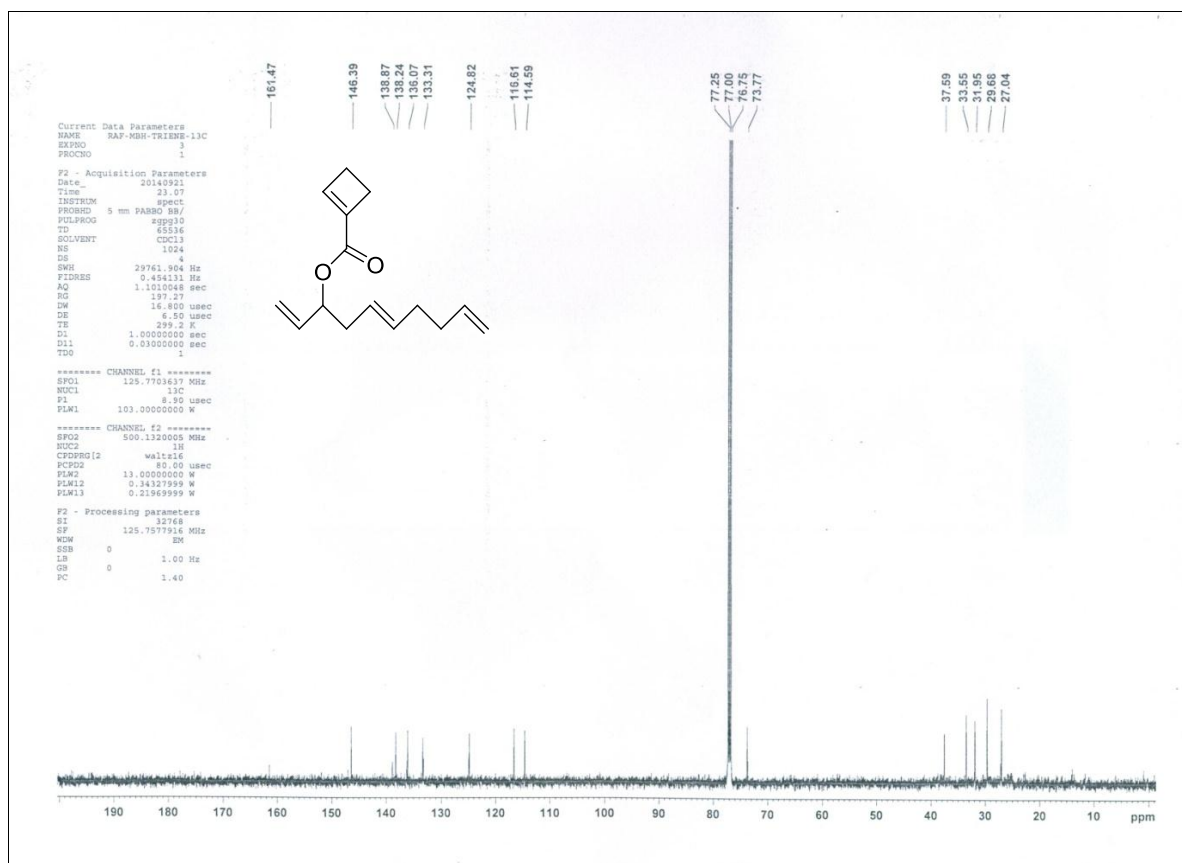

<sup>1</sup>H NMR (400 MHz, CDCl<sub>3</sub>/TMS) and <sup>13</sup>C NMR (125 MHz, CDCl<sub>3</sub>) of Compound 11

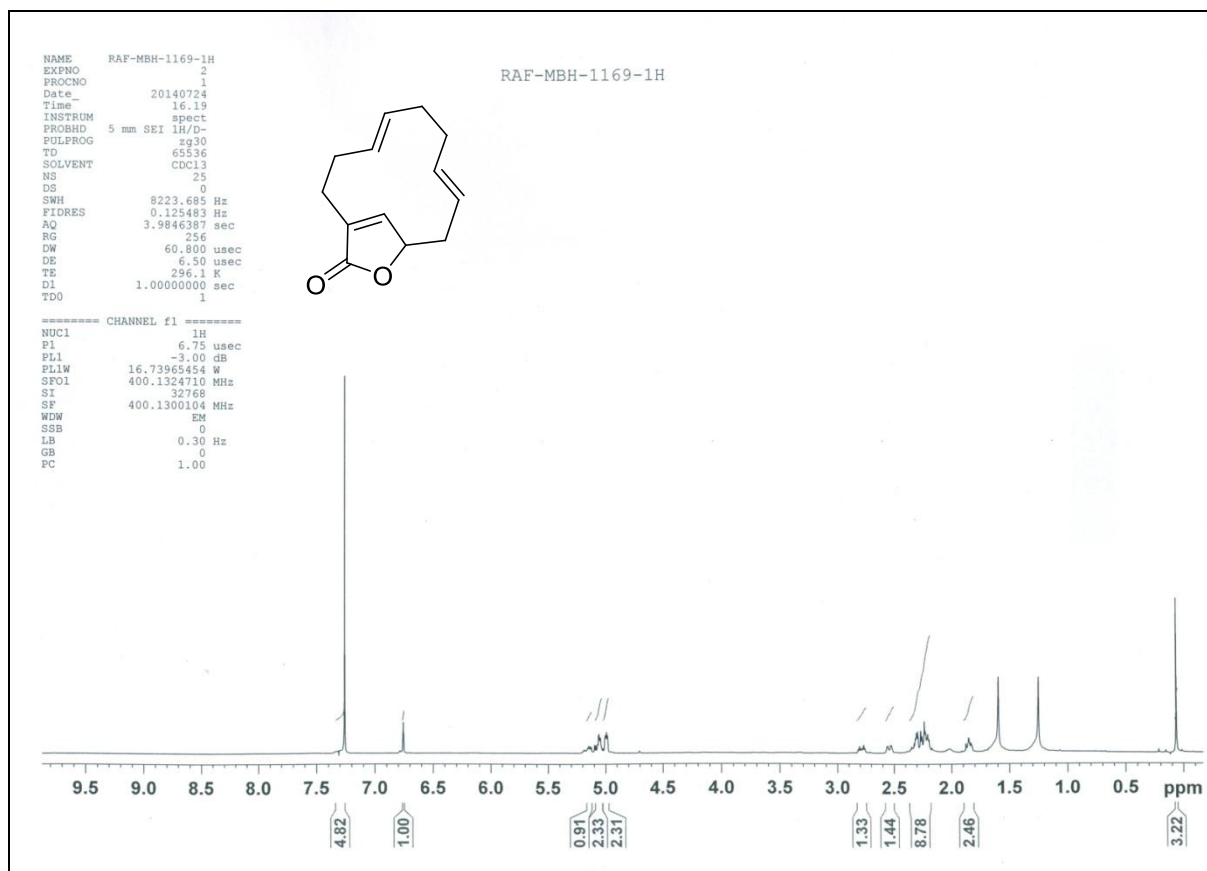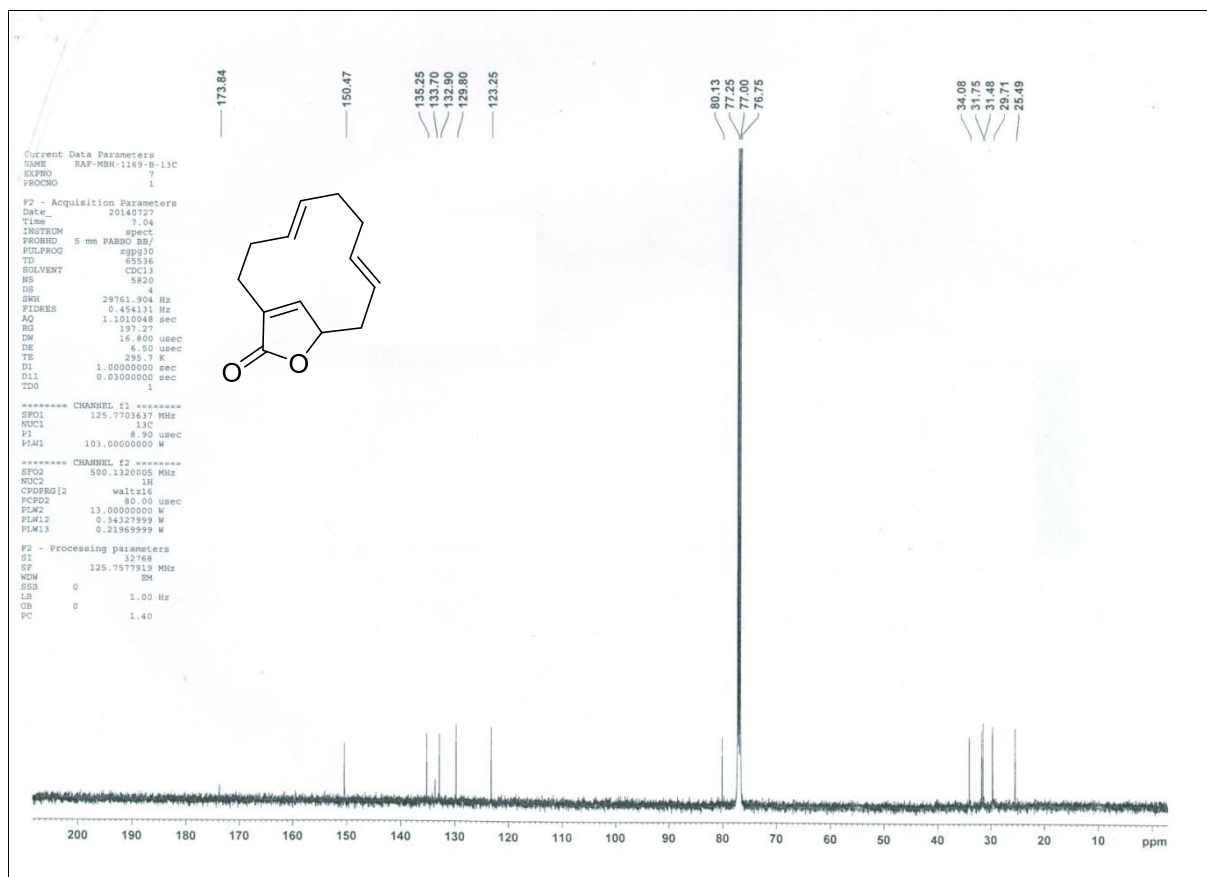

Supplement: c4ra10937f1.pdf [file c4ra10937f1.pdf]
